# Supplementary material for: Clinical effectiveness of pharmacy-led versus conventionally delivered antiviral treatment for hepatitis C in patients receiving opioid substitution therapy: a study protocol for a pragmatic cluster randomised trial
Source: PubMed Central journal article supplement — BMJ Open. 2018 Dec 14;8(12):e021443. doi: 10.1136/bmjopen-2017-021443 (PMC6303565; doi:10.1136/bmjopen-2017-021443), 2018-12-14
Supplement: bmjopen-2017-021443.draft_revisions.pdf [file bmjopen-2017-021443.draft_revisions.pdf]

# BMJ Open

BMJ Open is committed to open peer review. As part of this commitment we make the peer review history of every article we publish publicly available.

When an article is published we post the peer reviewers' comments and the authors' responses online. We also post the versions of the paper that were used during peer review. These are the versions that the peer review comments apply to.

The versions of the paper that follow are the versions that were submitted during the peer review process. They are not the versions of record or the final published versions. They should not be cited or distributed as the published version of this manuscript.

BMJ Open is an open access journal and the full, final, typeset and author-corrected version of record of the manuscript is available on our site with no access controls, subscription charges or pay-per-view fees (<http://bmjopen.bmj.com>).

If you have any questions on BMJ Open's open peer review process please email [editorial.bmjopen@bmj.com](mailto:editorial.bmjopen@bmj.com)

# BMJ Open

## **SuperDOT-C: Clinical effectiveness of pharmacy-led versus conventionally delivered antiviral treatment for Hepatitis C in patients receiving opioid substitution therapy: a pragmatic cluster randomised trial**

|                               |                                                                                                                                                                                                                                                                                                                                                                                                                                                                                                  |
|-------------------------------|--------------------------------------------------------------------------------------------------------------------------------------------------------------------------------------------------------------------------------------------------------------------------------------------------------------------------------------------------------------------------------------------------------------------------------------------------------------------------------------------------|
| Journal:                      | <i>BMJ Open</i>                                                                                                                                                                                                                                                                                                                                                                                                                                                                                  |
| Manuscript ID                 | bmjopen-2017-021443                                                                                                                                                                                                                                                                                                                                                                                                                                                                              |
| Article Type:                 | Protocol                                                                                                                                                                                                                                                                                                                                                                                                                                                                                         |
| Date Submitted by the Author: | 29-Dec-2017                                                                                                                                                                                                                                                                                                                                                                                                                                                                                      |
| Complete List of Authors:     | Radley, Andrew; NHS Tayside, Directorate of Public Health; University of Dundee Division of Cardiovascular and Diabetes Medicine, Liver Group<br>De Bruin, M; University of Aberdeen,<br>Inglis, Sarah; University of Dundee, Division of Neuoscience; University of Dundee, Tayside Clinical Trials Unit<br>Donnan, Peter; University of Dundee, Dundee Epidemiology and Biostatistics Unit<br>Dillon, John; University of Dundee Division of Cardiovascular and Diabetes Medicine, Liver Group |
| Keywords:                     | Hepatitis C, Clinical Pathways, Community Pharmacy, Randomised controlled trial, Direct-Acting antivirals                                                                                                                                                                                                                                                                                                                                                                                        |
|                               |                                                                                                                                                                                                                                                                                                                                                                                                                                                                                                  |

SCHOLARONE™  
Manuscripts

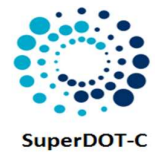

1  
2  
3  
4 **SuperDOT-C: Clinical effectiveness of pharmacy-led versus conventionally**  
5 **delivered antiviral treatment for Hepatitis C in patients receiving opioid**  
6 **substitution therapy: a pragmatic cluster randomised trial**  
7  
8

9 **Authors:** Authors: Andrew Radley <sup>1</sup>; Marijn de Bruin <sup>2</sup>; Sarah K Inglis <sup>3</sup>, Peter T Donnan <sup>3</sup>,  
10 John F Dillon <sup>4</sup>  
11

12  
13 **Affiliations:**  
14

- 15 1. NHS Tayside, Directorate of Public Health, Kings Cross Hospital, Clepington Road, Dundee DD3  
16 8EA  
17  
18 2. University of Aberdeen, 2nd Floor Health Sciences Building Room 206 Foresterhill Campus  
19 Ashgrove Road Aberdeen AB25 2ZD  
20  
21 3. Tayside Clinical Trials Unit, University of Dundee, Ninewells Hospital and Medical School, Dundee  
22 DD1 9SY  
23  
24 4. University of Dundee, Division of Molecular and Clinical Medicine , Ninewells Hospital and Medical  
25 School, Dundee DD1 9SY  
26  
27  
28  
29

30  
31 **Running Head:**  
32

33 Hepatitis C Testing and Treatment in Community Pharmacies  
34  
35

36 **Corresponding Author:**  
37

38 Andrew Radley  
39

40 NHS Tayside, Directorate of Public Health, Kings Cross Hospital, Clepington Road, Dundee DD3 8EA  
41

42 Tel: 01382 425681  
43

44 e-mail: Andrew.Radley@nhs.net  
45

46 **Key Words:** Hepatitis C; clinical pathways; community pharmacy; Randomised controlled  
47 trial; direct-acting antivirals  
48  
49  
50  
51  
52  
53  
54  
55  
56  
57  
58  
59  
60

## Abstract

Introduction: Hepatitis C Virus (HCV) infection affects 0.7% of the general population, and up to 40% of people prescribed Opioid Substitution Therapy (OST). In conventional care, less than 10% of OST users are tested for HCV and less than 25% of these initiate treatment. Community pharmacists see this group frequently to provide OST supervision. This study examines whether a pharmacist-led 'test & treat' pathway increases cure rates for HCV.

Methods and Analysis: This protocol describes a cluster randomised trial where 60 community pharmacies provide either conventional or pharmacy-led care. All pharmacies offer dried blood spot testing (DBST) for HCV. Participants have attended the pharmacy for OST for 3 months; are positive for HCV genotype 1 or 3; not co-infected with HIV and/or hepatitis B; no decompensated liver disease; not pregnant. For conventional care, pharmacists refer HCV positive participants to a local centre for assessment. In the pharmacy-led arm, pharmacists assess participants themselves in the pharmacy. Drug prescribing is by nurse prescribers (conventional arm) or pharmacist prescribers (pharmacy-led arm). Treatment in both arms is delivered as daily modified directly observed therapy (DOT) in a pharmacy. Primary trial outcome is number of sustained viral responses (SVR) at 12 weeks after treatment completion. Secondary trial outcomes are number of tests taken; treatment uptake; completion; adherence; re-infection. An economic evaluation will assess potential cost-effectiveness. Qualitative research interviews with clients and health professionals assess acceptability of a pharmacist-led pathway.

Ethics and Dissemination: This protocol has been ethically approved by the East of Scotland Research Ethics Committee 2 (15/ES/0086) and complies with the Declaration of Helsinki and principles of Good Clinical Practice. Informed consent is obtained before study enrolment and only anonymised data is stored in a secured database, enabling an audit trail. Results will be submitted to international peer-reviewed journals and presented at international conferences.

ClinicalTrials.gov Identifier: NCT02706223

Protocol version 3.0

Date 27 May 2016

### Strengths and limitations of this study

- Real world study developed through extensive modelling and feasibility work
- Potential to provide answers to an extremely topical question around approaches to eliminate a disease, in line with a WHO target.

1  
2  
3  
4  
5  
6  
7  
8  
9  
10  
11  
12  
13  
14  
15  
16  
17  
18  
19  
20  
21  
22  
23  
24  
25  
26  
27  
28  
29  
30  
31  
32  
33  
34  
35  
36  
37  
38  
39  
40  
41  
42  
43  
44  
45  
46  
47  
48  
49  
50  
51  
52  
53  
54  
55  
56  
57  
58  
59  
60

- Utilises a community pharmacy-based pathway in NHS Scotland, but not wider primary care systems
- Relies on close and integrated working between a specialist hepatitis service and community pharmacy services

For peer review only

## Introduction

Hepatitis C (HCV) is a blood-borne viral infection causing liver disease. Around 0.7% of the Scottish population are chronically infected with HCV [1]. Patient outcomes from HCV infection vary, with 25% clearing the infection spontaneously and the remainder becoming chronically infected, risking development of cirrhosis and hepatocellular carcinoma [2]. A recent Public Health England report highlighted that less than half of those infected with HCV have been identified, and of those identified less than 3% of those known to be infected with HCV are being treated [3]. The greatest risk of acquiring the virus in the UK is through injecting drug use [4] and evidence suggests around 40% of people receiving Opioid Substitution Therapy (OST) have HCV infection [5]. Only a small proportion of this high-risk and vulnerable population are receiving adequate treatment, despite having daily healthcare interaction with a pharmacist and the availability of a curative intervention with widely available Direct Acting Antiviral (DAA) medication [6].

The conventional care pathway in the United Kingdom recommends that patients with a history of intravenous drug use, or those currently prescribed OST, should be offered HCV testing annually [3]. Testing may be available from their GPs, drug workers, drug agencies, social workers, community pharmacies and needle exchanges [7]. Once diagnosed, patients can be referred to established treatment pathways, usually based around hepatology teams in secondary care. In these established treatment pathways, less than 10% of the OST population are tested for HCV annually. Of those tested, at most 25% start treatment in one of the dedicated centres and 70-80% successfully complete treatment, with treatment failure primarily caused by non-adherence and non-persistence to treatment [8]. Similar patterns are observed in other countries [9]. The inefficiency of established treatment pathways leads to increased preventable deaths from HCV and viral transmission within the injecting population [10].

A variety of reasons may explain the low rates of HCV testing, treatment uptake, and treatment completion. People who inject drugs (PWID) may encounter a number of barriers that prevent them from accessing care, including perceptions and experience of stigma and discrimination, issues with the organisation of care and the treatment policies of providers or payers [11]. There are identified deficiencies in the extent of screening and diagnosis of at-risk populations, as well as the need to simplify pathways to enable treatment initiation and clinical monitoring [12]. People who inject drugs may find it difficult to consistently attend medical clinics [13].

The WHO has set an ambitious goal to eliminate HCV as a public health threat by 2030 [14].

1  
2  
3 Creating the complex interventions necessary to eradicate HCV requires that well-designed  
4 cross-disciplinary programmes are put in place using different strategies to increase  
5 screening, testing and diagnosis [15]. Strategies that demonstrate increase testing and  
6 treatment uptake include the provision of integrated HCV care pathways; with drug use and  
7 psychiatric services delivered by a multidisciplinary team, and with case management  
8 services [16]. The delivery of HCV testing and treatment through community-based care  
9 pathways has also been shown to be feasible and DBST has been demonstrated to increase  
10 the uptake of testing from high-risk populations [17]. Hence, a more central role in the  
11 treatment of HCV for community-based pharmacists who are seeing these clients on a daily  
12 basis, could – in theory – lead to increased HCV treatment success rates through higher  
13 HCV testing, treatment uptake, adherence, and treatment completion rates.  
14  
15  
16  
17  
18  
19

20 In preparation for the current trial investigating the clinical benefits of pharmacy-delivered  
21 HCV treatment, pilot work was undertaken guided by the MRC theoretical framework for  
22 developing and evaluating complex interventions [18]. Initial work involved using a co-  
23 production approach in partnership with OST patients. This work identified the current  
24 experiences of patients in accessing HCV testing and treatment and in accessing OST in  
25 pharmacies [19]. The attributes of an ideal service were identified and an estimate of  
26 potential uptake made [20]. The implementation of DBST in pharmacies was undertaken and  
27 the experiences of patients and providers recorded [21]. A pilot trial has been undertaken to  
28 test each stage of the pharmacy-led care pathway and to look for confirmation that an  
29 appropriately powered definitive multicenter randomised controlled trial would be feasible  
30 [22]. The PRECIS-2 tool was used to assess that the design decisions were concordant with  
31 the purpose of the trial (Supplementary material) (23).  
32  
33  
34  
35  
36  
37  
38

39 The aim of this research is to examine the impact of pharmacy-delivered HCV treatment on  
40 HCV treatment success rates amongst OST users. Our research questions are:  
41  
42

#### 43 *Trial*

- 44  
45 (1) Does a community pharmacist-led HCV treatment pathway increase treatment success  
46 rates (sustained virological response, or SVR) compared to the conventional pathway?  
47  
48  
49 (2) Does a community pharmacist-led HCV treatment pathway lead to a higher uptake of  
50 HCV testing?  
51  
52  
53 (3) Does a community pharmacist-led HCV treatment pathway lead to a higher uptake and  
54 completion of HCV treatment?  
55  
56  
57  
58  
59  
60

1  
2  
3 (4) Is adherence and persistence to HCV therapy in the pharmacy setting similar to that in  
4 the Conventional pathway?  
5

6 (5) What is the re-infection rate at 12 months after end of treatment in all patients with SVR,  
7 and for the pharmacist-led pathway compared to the conventional pathway?  
8  
9

#### 10 *Health Economics Study*

11  
12 (6) Is the pharmacist-led pathway potentially a cost-effective method of testing and treating  
13 HCV in people prescribed OST?  
14  
15

#### 16 *Qualitative Study*

17  
18 (7) Is the pharmacist-led pathway an acceptable way to offer testing and treatment for  
19 people prescribed OST infected with HCV and are there any unexpected consequences?  
20  
21

### 22 **Methods:**

#### 23 *Design*

24  
25 Super DOT-C is a cluster randomised trial of pharmacy-led anti HCV therapy versus  
26 conventional care in HCV infected patients attending community pharmacies. Sixty  
27 pharmacies will be enrolled to this study across 5 hubs in Health Boards in NHS Scotland.  
28 Pharmacies (and thus their patients) participating in the trial will be randomly allocated to  
29 conventional care pathway or the pharmacy-led pathway.  
30  
31

32 Pharmacies at each site are randomised into two groups: conventional care and pharmacist-  
33 led care. Randomisation will be carried out using <http://www.randomization.com>. The  
34 subjects are randomized into one block along with the number of subjects per block/number  
35 of blocks and (case-sensitive) treatment labels. The pharmacies in each hub provide the  
36 level of randomisation, so patient allocation is dependent on the pharmacy attended.  
37  
38  
39  
40  
41

#### 42 *Eligibility Criteria*

43  
44 Eligible pharmacies are community-based, offer dried blood spot testing for HCV by trained  
45 pharmacy staff in line with approved practice in their particular NHS board and have at least  
46 30 patients on OST to ensure adequate recruitment. Patient inclusion criteria are having  
47 HCV PCR positive to genotype 1 or 3, are OST users and willing to have their pharmacists  
48 supervise their antiviral drug use. Patient exclusion criteria are having another genotype than  
49 1 or 3, evidence of current or previous decompensated liver disease, HIV infection, HBsAg  
50 positive with detectable HBV DNA, aggressive or violent behaviour towards the pharmacist,  
51 being pregnant, and not being able to provide informed consent.  
52  
53  
54  
55  
56  
57  
58  
59  
60



## Interventions

### Medication provided

The anti HCV treatment provided in both pathways is identical, ie:

- For HCV genotype 1 sofosbuvir/ledipasvir for 8 weeks
- For HCV genotype 3 sofosbuvir/daclatasvir for 12 weeks

### Study Site Staff Training

Staff from each study site will receive training on Good Clinical Practice, quality control, use of study documentation, ensuring common practice, and consenting participants. In addition training to establish testing for blood borne viruses is provided and information on hepatitis C and its treatment is provided. Staff in the pharmacy-led arm are trained on how to interpret laboratory bloods and to perform a Fib4 calculation [24].

The similarities and differences between the two study arms are summarised in Table 1 below

**Table 1: Treatment pathways: similarities and differences**

|                              | Conventional care                                                                                 | Pharmacy pathway                                                                               | Contrast                                                                                                                                             |
|------------------------------|---------------------------------------------------------------------------------------------------|------------------------------------------------------------------------------------------------|------------------------------------------------------------------------------------------------------------------------------------------------------|
| <b>HCV testing</b>           | Opportunistic HCV testing on presentation for OST therapy                                         | Opportunistic HCV testing on presentation for OST therapy                                      | The same procedure is provided in each of the study arms                                                                                             |
| <b>HCV test confirmation</b> | Test result is communicated and - if positive – referred for assessment in local treatment centre | Test result is communicated and – if positive - assessment directly undertaken in the pharmacy | Assessment for treatment is carried out at the pharmacy when the participant visits to obtain OST, not at a different site with a different provider |
| <b>Treatment initiation</b>  | Suitable patients are prescribed treatment by a nurse prescriber at the                           | Suitable patients are prescribed treatment by a pharmacist prescriber                          | Treatment initiation is carried out at the pharmacy and not at a                                                                                     |

|                             |                                                                            |                                                     |                                                                                                                                                       |
|-----------------------------|----------------------------------------------------------------------------|-----------------------------------------------------|-------------------------------------------------------------------------------------------------------------------------------------------------------|
|                             | local treatment centre and access treatment through DOT at their pharmacy  | and access treatment through DOT at their pharmacy  | different site with a different provider                                                                                                              |
| <b>Treatment monitoring</b> | Treatment monitoring is carried out by the specialist team in their clinic | Treatment monitoring is carried out at the pharmacy | Treatment monitoring is carried out at the pharmacy not at a different site. Monitoring in the conventional pathway requires additional clinic visits |
| <b>Treatment completion</b> | SVR testing is carried out by DBST at the pharmacy                         | SVR testing is carried out by DBST at the pharmacy  | The same procedure is provided in each of the study arms                                                                                              |

#### *Conventional Care Pathway*

At the start of the pathway pharmacists will opportunistically discuss HCV infection with their OST patients. The pharmacist will record on a screening log which of the OST patients attending the pharmacy they have approached. Those with unknown HCV status will be offered testing using a DBST in the pharmacy [25]. Patients identified as having HCV antibodies will have a post-test discussion with the pharmacist. During this discussion the pharmacists will obtain informed consent and explain about HCV treatment using a standard infographic (supplementary materials). Next, the pharmacist will offer them referral to the conventional care pathway for assessment and treatment at a local treatment centre. Information will be provided verbally and by offering standard leaflets about HCV. If the patient attends an appointment at one of the local treatment centres, a member of the specialist hepatitis team will invite the patient to undertake assessment for treatment for HCV. Assessment comprises of a pre-treatment checklist of medical co-morbidities, medical history, and concomitant medication to look for drug-drug interactions. The patient will undergo phlebotomy in the local treatment centre to check full blood count, urea and electrolytes, liver function testing, including markers of liver fibrosis [24] (Fib4, APRI, AST:ALT ratio) and viral parameters (genotype and load), as assessment for treatment. Patients who are referred for assessment and treatment will be managed according to the standard local treatment pathway, which includes DAA treatment delivery jointly with OST in

1  
2  
3 their normal pharmacy; which would qualify as DOT during weekdays, although at weekends  
4 patients self-administer. Prescriptions will be provided by a nurse prescriber and dispensed  
5 at the participant's normal pharmacy. For doses that patients have to self-administer and the  
6 weekend doses when there is no OST distribution, the pharmacist and patient will make a  
7 brief if-then action plan (an implementation intention) and coping plan (to overcome  
8 anticipated barriers) [26]. The study related data collection will be undertaken by the  
9 specialist hepatitis team.  
10  
11  
12

### 13 *Pharmacist-Led Pathway*

14  
15  
16 Potential participants are offered testing, recruited and consented as in the conventional  
17 pathway. In the pharmacy-led pathway however, the pharmacist will offer them anti-HCV  
18 therapy delivered solely within the pharmacy. The patients who decline study participation  
19 will be entered in the screening log. For the patients who do consent, the pharmacist will  
20 complete a pre-treatment checklist of medical co-morbidities, medical history, and  
21 concomitant medication to look for drug-drug interactions. The patient will undergo  
22 phlebotomy in the pharmacy for safety blood tests, as in the conventional pathway and the  
23 pharmacist will assess this information to determine suitability for treatment.  
24  
25  
26  
27

28 If there are no contra-indications to therapy, the patient will commence the treatment. In  
29 patients where there are contraindications or queries about suitability, the pharmacist will  
30 contact the central clinical co-ordinator for advice. Unsuitable patients will be referred to the  
31 conventional pathway for assessment outside the study as standard clinical care.  
32  
33

34 Prescriptions for treatment will be provided by pharmacist prescriber. Suitable patients  
35 entering treatment will have DAA treatment delivered jointly with OST; mostly daily DOT,  
36 except at weekends daily dispensing of therapy drugs, as in the conventional pathway.  
37 Patients who do not attend the pharmacy for seven consecutive days will be discontinued  
38 from the study since they will be deemed to have discontinued their course of DAA treatment  
39 and will have had their OST discontinued. The primary study outcome (SVR 12 weeks after  
40 treatment completion) is assessed by DBST in the pharmacy for both study arms.  
41  
42  
43  
44  
45

### 46 **Outcomes and measures**

47 The denominator for the outcomes on treatment uptake is the number of people using OST  
48 at the pharmacies participating in the respective arms. For the primary outcome, the  
49 numerator will be the number of patients with Sustained Viral Response at 12 weeks post  
50 treatment completion (SVR12) after allocation to treatment arm, measured through a test for  
51 the presence of HCV RNA (polymerase chain reaction).  
52  
53  
54  
55  
56  
57  
58  
59  
60

1  
2  
3 For the secondary outcomes on treatment uptake, the numerators are the number of  
4 patients who (a) undergo HCV testing, (b) initiate HCV treatment, (c) complete the 12-week  
5 HCV course, (d) number of patients with SVR at 12 months (to assess the impact of  
6 potential reinfection).  
7

#### 8 Study schedule 9

10  
11 For both arms, screening for HCV by DBST is undertaken prior to recruitment ( $t_0$ ); participant  
12 consent ( $t_1$ ) is followed by 8 or 12 weeks of treatment according to HCV genotype ( $t_{12}$ ), 12  
13 weeks post-treatment a final SVR test is taken to determine the study outcome ( $t_{\text{endpoint}}$ )  
14  
15

#### 16 Sample Size: 17

18 Approximately 22,000 patients are prescribed OST across Scotland [26]. Around 85% of  
19 these patients receive daily or regular supervision of their OST consumption through one of  
20 the 1200 community pharmacies. It is expected that at least 40% of these patients will be  
21 infected with HCV, and that around 46% and 48% of infections will be with Genotype 1 and  
22 Genotype 3 respectively [26]. The pharmacies acting as cluster sites for this trial have  
23 around 1,800 patients attending for supervised OST administration. Sixty community  
24 pharmacies based around 5 study sites within Scottish NHS Boards, will be coordinated  
25 through the Tayside Clinical Trials Unit (TCTU) of the Tayside Medical Science Centre,  
26 University of Dundee.  
27  
28  
29  
30  
31

32 As the pharmacy-led pathway is a specific population-based intervention, the number of  
33 patients on OST treatment at each pharmacy will be the denominator for calculating DBST  
34 uptake. The HCV infection status of all the OST patients in the denominator population is not  
35 known. National data repeatedly shows approximately 40% of Patients on OST are HCV  
36 positive, as this is a randomised trial it can be assumed that the rate of HCV positivity in the  
37 OST patients/pharmacies randomised to the pathways should be the same. The study will  
38 be powered through rates of HCV therapy offered. Approximately 3% of HCV positive OST  
39 patients enter HCV therapy per year via conventional pathways, with 2.5% of the total  
40 eligible population achieving SVR per annum. If it is estimated that the new pathway  
41 increased this to 15%, a sample in each arm of 141 ( $2N = 282$ ) will give 90% power at the  
42 significance level. The clustered design requires inflation, so if the average infected subjects  
43 per pharmacy is 20, the Inflation Factor for sizes of cluster assuming an intra-cluster  
44 correlation of 0.05, is 1.95. This leads to a need for  $2N = 550$ .  
45  
46  
47  
48  
49  
50  
51

52 The sample of 60 pharmacies with an average of 30 OST patients per pharmacy gives 1800  
53 OST patients, assuming 40% HCV positive, gives over 800 potential patients for study. This  
54 gives significant protection against any changes in baseline SVR success rates, but also  
55  
56  
57  
58  
59  
60

1  
2  
3 against pharmacy drop-outs or local issues that prevent an enrolled pharmacy from  
4 participation. This is trial of a pathway so all eligible patients are the denominator for the  
5 power calculation, not the patients who actually enter the pathway and are treated.  
6  
7

8 The randomisation of the pharmacies will be stratified by associated hub centre. The  
9 endpoint of the study is the effectiveness of the pathway so any drop-outs are part of the  
10 study outcomes, so there is no need to increase the sample size to allow for a dropout rate.  
11  
12

### 13 Data collection, management and analysis 14

15  
16 Analysis of the trial will follow the principles outlined in the ICH E9 'Statistical Principles for  
17 Clinical Trials' and carried out by the UKCRC registered Tayside Clinical Trials Unit (TCTU).  
18 Prior to data lock an agreed Statistical Analysis Plan (SAP) will be finalised covering the pre-  
19 specified statistical analysis.  
20  
21

22 The primary outcome of SVR will be assessed as a binary outcome for subjects and so will  
23 utilise logistic regression modelling. The numerator will be the number of subjects achieving  
24 SVR at 12 weeks and the denominator will be total number of patients using OST at the  
25 participating pharmacies. Additionally results will be expressed as a proportion of the  
26 estimated HCV infected subjects on OST. The estimated number of infected patients will be  
27 based on national survey data and the empirical rate discovered in the trial (allowing for  
28 patients who refuse testing). In order to account for the clustered nature of the trial, a mixed-  
29 effects logistic regression model will be performed with the parameter indicator of trial arm in  
30 the model and a random parameter to account for within cluster correlation as well as  
31 stratified by hub. As all patients will have either achieved SVR or not and we will assume  
32 that drop-outs / lost to follow-up are failures, there will be no missing data in the primary  
33 outcome. Extra- binomial variability or over-dispersion will be examined in the logistic model  
34 and if present alternative modelling such as negative binomial models will be considered.  
35 This will also be adjusted by therapy and genotype; the two factors are interdependent  
36 determining length of therapy.  
37  
38  
39  
40  
41  
42  
43  
44

45 Secondary binary outcomes - will be analysed in the same procedure, initially as intention to  
46 treat with all eligible patients as the denominator and then to explore the steps in the  
47 pathway by per protocol analysis in particular to analyse on treatment success:  
48  
49

- 50
- 51 • Proportion of HCV tested: within the duration of the study of those attending pharmacy  
52 sites for OST, for the conventional and for the pharmacist-led arm  
53
- 54 • Proportion that initiate HCV treatment within the duration of the study of those identified  
55 with HCV, for the conventional and for the pharmacist-led arm.  
56  
57  
58  
59  
60

1  
2  
3 Proportion that complete the course of those initiating treatment: Multiple logistic regression  
4 modelling will explore the patient and pharmacy characteristics that are associated with the  
5 secondary outcomes and primary outcome. Patient outcomes considered will be:  
6

- 7 • age
- 8 • gender
- 9 • deprivation,
- 10 • employment,
- 11 • co-morbidity,
- 12 • psycho-social variables assessed.

13  
14  
15  
16 Pharmacy characteristics considered will be:

- 17 • geographic location
- 18 • type of pharmacy service
- 19 • size of OST population.

20  
21  
22  
23 Determination of re-infection: As the determination of possible re-infection is an important  
24 and stated secondary outcome in this study, all patients will be invited to consent for a  
25 further DBS HCV PCR one year after end of therapy or at end of the study, whichever is first.  
26 Those patients who achieve SVR will be invited to participate at their pharmacy.  
27  
28

#### 29 30 Data management

31  
32 An EXCEL database will be used to hold the study related data. This will be managed and  
33 controlled by the coordinating pharmacist in NHS Tayside with site specific data being  
34 transcribed from a paper CRF formulated in line with the EXCEL database, with the study  
35 protocol and in line with the requirements of the investigators. Development and validation of  
36 the study database, QC and extraction of data will be done according to study sponsor  
37 procedures. Extracts for analysis will be based on the data tables provided by the study  
38 team.  
39  
40  
41  
42

#### 43 44 Health Economic Assessment

45  
46 Economic analysis will be undertaken alongside the trial, utilizing the costs, resource use  
47 and effectiveness data generated within the trial. The number of SVRs achieved at the end  
48 of the trial will be combined with the cost data to calculate the incremental cost per cure. A  
49 longer term analysis incorporating the cost and benefits of potential lifetime gains through  
50 citizenship will be undertaken.  
51  
52  
53

#### 54 55 Qualitative Assessment

1  
2  
3 The qualitative research will take the form of a process evaluation building on previous  
4 exploratory and preparatory work (22). It will contribute to the assessment of the feasibility  
5 and acceptability to service users and providers of a pharmacy-led testing and treatment  
6 pathway (including identification of barriers and facilitators and unintended consequences of  
7 participation).  
8  
9

10  
11 Interviews will be conducted with small samples of (i) consenting study participants and (ii)  
12 professionals providing the pharmacist led pathway by researchers at University of Dundee.  
13  
14

15  
16 Qualitative interviews will be conducted with consenting participants and professionals using  
17 semi-structured topic guides developed in line with the research aims. Topics will not be  
18 explored in a prescriptive manner but as part of an open discussion. This flexible format will  
19 enable additional salient topics and insights to emerge. In broad terms, the focus for the  
20 different respondent groups will be as follows:  
21  
22

23  
24 One-to-one interviews with consenting participants (all of whom have engaged with the  
25 service) will explore views on issues around the delivery and promotion of the pharmacist-  
26 led pathway, their response to the offer and delivery of treatment, and any unintended  
27 consequences.  
28  
29  
30

31  
32 Interviews with professionals will explore issues around implementation of the intervention  
33 and the trial elements, identify challenges and ways they have been overcome, and  
34 perceived response among participants.  
35  
36  
37

38 With the interviewee's consent, all interviews and focus group discussions will be recorded  
39 as digital audio files, which will then be transcribed in full for thematic analysis. Transcripts  
40 will be organized using a thematic framework based on topics specified in the topic guide  
41 and emerging themes identified through a process of familiarization with transcript texts.  
42  
43  
44

## 45 **Discussion**

46  
47 Liver disease has become a major cause of premature death in the developed world and  
48 HCV is a major contributor to this burden [28]. The care of people infected with HCV therapy  
49 has undergone a paradigm shift due to the efficacy of direct acting antiviral drugs and the  
50 consequent simplification of therapy, with highly effective treatment choices marketed across  
51 the world [29]. However, new and more effective pathways of care are urgently required in  
52 order to enhance testing and linkage to care and treatment [16]. These novel pathways of  
53  
54  
55  
56  
57  
58  
59  
60



1  
2  
3 care need to be carefully evaluated both for efficacy and cost-effectiveness compared to  
4 traditional pathways, as well as for unintended consequences. This pragmatic, cluster-  
5 randomised trial can provide strong evidence of the effectiveness of a pharmacist delivered  
6 care pathway for HCV eradication therapy in patients receiving OST. A comparison will be  
7 undertaken with the current clinical care pathway where patients are referred to a  
8 conventional clinic to receive their HCV treatment. Trial design has aimed for high  
9 applicability in design decisions [24] and this trial is expected to directly inform the future  
10 organisation of care.  
11  
12  
13  
14

## 15 **Ethics and Dissemination**

16  
17  
18 The study will be conducted in accordance with the principles of good clinical practice  
19 (GCP).  
20

21  
22 In addition to Sponsorship approval, approval was received for this study (15/ES/0086) from  
23 East of Scotland Research Ethics Committee 2 on 27 May 2016. Caldicott guardian approval  
24 was given on 16 December 2016 to allow NHS Tayside to pass information to the cluster  
25 community pharmacies about the HCV test status of patients that they are seeing to provide  
26 OST supervision. NHS R&D approvals have been obtained from each health board taking  
27 part in the study.  
28  
29  
30

### 31 *Harms*

32  
33 Regular follow up of the participants will occur daily in the DOT arm during the study  
34 treatment period by a pharmacist familiar in the trial methodology. For those participants  
35 allocated to the conventional therapy, regular clinical follow up will occur in line with  
36 prevailing conventional NHS standard of care. At each visit participants will be monitored for  
37 expected Adverse Events (AEs) as per the Summary of Product (SmPC) characteristics for  
38 the drug treatments used in this study. This is in line with the current standard of care for the  
39 NHS and only AEs outside these criteria will formally be recorded as Adverse Events  
40  
41 Bloods for viral load would be performed as outlined in the Study Schedule, at the pre  
42 treatment visit and at 12 weeks post completion of therapy, as per the attached study  
43 schedule. Data on testing, referral, initiation of (and adherence to), therapy are routinely  
44 collected for the HCV clinical data base and these data will also be utilised.  
45  
46  
47  
48  
49

50  
51 In addition baseline and end of treatment checking of prescribed and non-prescribed  
52 medications and drug use, as documented in the study concomitant medications log, will be  
53 carried out to investigate the relationship between any adverse events and drug interactions.  
54  
55

### 56 *Consenting Participants*



1  
2  
3 Potential participants will be approached by pharmacy staff familiar with the trial  
4 methodology and trained in Good Clinical Practice. They will be provided with information on  
5 the study verbally and via the Patient Information Sheet (PIS) and be given at least 24 hours  
6 to consider participation.  
7  
8

9 At their return visit for screening they will be interviewed by the study pharmacist and asked  
10 to sign an informed consent form, once they are satisfied that they have had adequate  
11 explanation from the pharmacist explaining the trial to them.  
12  
13

#### 14 *Confidentiality*

15  
16 The data will be collected by the researcher (treatment delivering pharmacist or nurse) on a  
17 paper CRF with subsequent transcription to electronic CRF. Electronic storage will be in an  
18 encrypted form on a password protected device. The medical notes will act as source data  
19 for past medical history & blood results  
20  
21  
22

23 All laboratory specimens, evaluation forms, reports, and other records will be identified in a  
24 manner designed to maintain participant confidentiality. All records will be kept in a secure  
25 storage area with limited access to study staff only. Clinical information will not be released  
26 without the written permission of the participant, except as necessary for monitoring and  
27 auditing by the Sponsor or its designee. The CI and study staff involved with this study will  
28 not disclose or use for any purpose other than performance of the study, any data, record, or  
29 other unpublished, confidential information disclosed to those individuals for the purpose of  
30 the study. Prior written agreement from the Sponsor or its designee will be obtained for the  
31 disclosure of any said confidential information to other parties.  
32  
33  
34  
35  
36

#### 37 *Data Protection*

38  
39 The CI and study staff involved with this study will comply with the requirements of the Data  
40 Protection Act 1998 with regard to the collection, storage, processing and disclosure of  
41 personal information and will uphold the Act's core principles. The CI and study staff will also  
42 adhere, if appropriate, to the current version of the NHS Scotland Code of Practice on  
43 Protecting Patient Confidentiality. Access to collated participant data will be restricted to the  
44 CI and appropriate study staff. Computers used to collate the data will have limited access  
45 measures via user names and passwords. Published results will not contain any personal  
46 data that could allow identification of individual participants.  
47  
48  
49  
50  
51  
52  
53  
54

#### 55 **Trial Organisation**

### *Trial management*

Overall management of the trial is being provided by the Tayside Clinical Trials Unit (TCTU), a UK Clinical Research Collaboration (UKCRC)-registered clinical trials unit. A study Clinical Trial Manager supported by a Study Coordinator will oversee the study and will be accountable to the Chief Investigator (CI). They will be responsible for checking the Case Report Forms for completeness, plausibility and consistency. However, this remains the overall responsibility of the CI. Any queries will be resolved by the CI or delegated member of the study team.

A study-specific Delegation Log will be prepared for the study at each site, detailing the responsibilities of each member of staff working on the study.

A Trial Steering Committee will be established to oversee the conduct and progress of the study. The Steering Committee will include the investigators above, as well as the NHS Tayside Director of Pharmacy and a representative from the Chief Pharmaceutical Officers Team at the Scottish Government. The Steering Committee will take all executive decisions. The responsibility of the Steering Committee is to ensure the scientific integrity and quality of the project. To achieve this, the specific responsibilities of the Steering Committee include: maintaining adherence to the study protocol; approving changes to study protocol if required; reviewing quality assurance indicators; monitoring study recruitment and the overall study timetable; advising, as required, on specific scientific items that may arise; compliance with legislation; adherence to research governance; reporting to funders; approving publication and dissemination strategies. The Steering Committee will meet every 6 months.

### **Trial Status**

Recruitments commenced in December 2016. On 9 October 2017, 234 were consented to the trial.

### **Declarations**

#### **Trial Funding**

This study was funded in partnership by the Scottish Government, Gilead Inc and Bristol-Myers Squibb. Funders have no responsibilities for or authority over study design; collection, management, analysis or interpretation of data; writing of the report; and the decision to submit the report for publication

1  
2  
3  
4 Reporting guideline: SPIRIT 2013 statement: defining standard protocol items for clinical  
5 trials

6  
7 [http://annals.org/aim/article/1556168/spirit-2013-statement-defining-standard-protocol-items-  
9 clinical-trials](http://annals.org/aim/article/1556168/spirit-2013-statement-defining-standard-protocol-items-<br/>8 clinical-trials)

10  
11 Contributor Statement:

12  
13 Andrew Radley: study conception, planning and design, protocol preparation, manuscript  
14 preparation.

15  
16 Marijn de Bruin: study conception, planning and design, protocol preparation manuscript  
17 preparation

18  
19 Sarah Ingles: protocol preparation, randomisation, study management, manuscript  
20 preparation

21  
22 Peter T Donnan: study conception and design, statistical analysis plan, protocol preparation,  
23 manuscript preparation

24  
25 John F Dillon: study conception and design, protocol preparation, manuscript preparation

26  
27  
28 Competing Interests:

29  
30 Mr Radley: Honorariums from Gilead and Abbvie; Research Grants from Gilead and Roche

31  
32 Professor Dillon: Research Grants, and Honorariums from Abbvie, Bristol Myers Squibb,  
33 Gilead, Janssen, Merck Roche Sharp & Dohme and Roche.

34  
35 Dr Inglis: None

36  
37 Prof Donnan: Research grants from Novo Nordisk, GSK, Shire pharmaceuticals, Gilead and  
38 Bristol Myers Squibb. Member of the New Drugs Committee of the Scottish Medicines  
39 Consortium.

40  
41 Prof de Bruin: None

42  
43 Data Sharing Statement:

44  
45 The original protocol and substantive amendments are available. Data generated by the  
46 study will be made available post publication as per standard operating procedures for the  
47 University of Dundee Clinical Trials Centre  
48  
49  
50  
51  
52  
53  
54  
55  
56  
57  
58  
59  
60

## References

1. Scottish Intercollegiate Guidelines Network (SIGN). Management of hepatitis C. Edinburgh: SIGN; 2013. (SIGN publication no. 133). [July 2013]. Available from URL: <http://www.sign.ac.uk> (Accessed December 2017)
2. Arain A, Robaeys G. Eligibility of persons who inject drugs for treatment of hepatitis C virus infection. *World J Gastroenterol* 2014; 20(36): 12722-12733 <http://www.wjgnet.com/1007-9327/full/v20/i36/12722.htm> (Accessed December 2017)
3. Hepatitis C annual report: progress made, but much more to do. *Public Health England*. July 2014. <https://www.gov.uk/government/news/hepatitis-c-annual-report-progress-made-but-much-more-to-do> (Accessed December 2018)
4. HCV treatment rates and sustained viral response among people who inject drugs in seven UK sites: real world results and modelling of treatment impact Martin N, Foster GR; Vilar J; Ryder S; Cramp M; Gordon F; Dillon JF; Craine N; Busse H; Clements A; Hutchinson SJ; Ustianowski A; Ramsay M; Goldberg DJ Irving W; Hope V; DeAngelis D; Lyons M; Vickerman P, Hickman M. *Journal of Viral Hepatitis* 2014 doi:10.1111/jvh.12338.
5. Aspinall EJ, Doyle JS, Corson S, Hellard ME, Hunt D, Goldberg D, Nguyen T, Falck-Ytter Y, Morgan RL, Smith B, Stooze M, Wiktor SZ, Hutchinson S. Targeted hepatitis C antibody testing interventions: a systematic review and meta-analysis. *Eur J Epidemiol* 2015. DOI 10.1007/s10654-014-9958-4
6. Grebely J, Bruneau J, Bruggman P, Harris M, Hickman M, Rhodes T. Elimination of hepatitis C virus infection among PWID: The beginning of a new era of interferon-free DAA therapy. *IJDP* 2017; 47:26-33
7. Tait JM, Wang H, Stephens BP, Miller M, McIntyre PG, Cleary S, Dillon JF. Multidisciplinary managed care networks—Life-saving interventions for hepatitis C patients. *Journal of Viral Hepatitis* 2016. DOI: 10.1111/jvh.12633
8. Uptake of hepatitis C specialist services and treatment following diagnosis by dried blood spot in Scotland. McAllister, G., Innes, H., Mcleod, A., Dillon, J. F., Hayes, P. C., Fox, R., Barclay, S. T., Templeton, K., Aitken, C., Gunson, R., Goldberg, D. & Hutchinson, S. J. *Journal of Clinical Virology* 2014;61(3):359-64. doi: 10.1016/j.jcv.2014.09.004.
9. European Monitoring Centre for Drugs and Drug Addiction (2016), Hepatitis C among drug users in Europe: epidemiology, treatment and prevention, EMCDDA Insights 23, Publications Office of the European Union, Luxembourg
10. Treloar C, Newland J, Rance J, Hopwood M. Uptake and delivery of hepatitis C treatment in opiate substitution treatment: perceptions of clients and health professionals. *Journal of Viral Hepatitis*. 2010;17:839–844,
11. Lavanchy D. The global burden of hepatitis C. *Liver International* 2009; 29(s1): 74-81
12. Konerman M, Lok, ASF. Hepatitis C treatment and barriers to eradication. *Clinical and Translational Gastroenterology* 2016; 7,e193: doi: 10.1038/ctg.2016.50
13. Papatheodoridis GV, Tsochatzis E, Hardtke S, Wedeyer H. Barriers to care and treatment for patients with chronic viral hepatitis in Europe: a systematic review. *Liver International* 2014; 34: 1452-1463
14. WHO 2016. Combating Hepatitis B and C to reach elimination by 2030 – Advocacy Brief. World Health Organisation, Geneva May 2016. <http://www.who.int/hiv/topics/hepatitis/en/>
15. Wade AJ, Veronese V, Hellard ME, Doyle JS. A systematic review of community based hepatitis C treatment. *BMC Infectious Diseases* 2016; 202: DOI 10.1186/s12879-016-548-5
16. Leask JD, Dillon JF. Targeting people who inject drugs as a pathway towards hepatitis C eradication. *Alimentary Pharmacology and Therapeutics* 2016; 44: 145-156.

- 1  
2  
3 17 Bajis S, Dore GJ, Hajarizadeh B, Cunningham EB, Maher L, Grebely J. Interventions to  
4 enhance testing, linkage to care and treatment uptake for hepatitis C virus infection among  
5 people who inject drugs: A systematic review. *International Journal of Drug Policy* 2017; 47:  
6 34-46.
- 7 18. 19. Craig P, Dieppe P, Macintyre S, Michie S, Nazareth I, Petticrew M. Developing and  
8 evaluating complex interventions: new guidance 2006. Medical Research Council.  
9 <https://www.mrc.ac.uk/documents/pdf/complex-interventions-guidance/> (Accessed  
10 December 2017)
- 11 19. Radley A, Melville K, Easton P, Williams B, Dillon J. "Standing Outside the Junkie Door"  
12 Service Users' Experiences of Using Community Pharmacies to Access Treatment for  
13 Opioid Dependency. *Journal of Public Health* 2016 DOI: 10.1093/pubmed/fdw138.
- 14 20. Radley A, van der Pol M, Dillon JF. Designing a hepatitis C testing service in primary  
15 care: a discrete choice experiment. *Gut* 2016; 64 (S1).  
16 [http://gut.bmj.com/content/64/Suppl\\_1/A103.2](http://gut.bmj.com/content/64/Suppl_1/A103.2) (accessed December 2017)
- 17 21 Radley A, Melville K, Tait J, Stephens B, Evans JMM, Dillon JF. A Quasi-Experimental  
18 Evaluation of Dried Blood Spot Testing through Community Pharmacies in the Tayside  
19 Region of Scotland. *Frontline Gastroenterology* 2017. doi:10.1136/flgastro-2016-100776
- 20 22. Radley A, Tait J, Dillon JF. DOT-C: A Cluster Randomised Feasibility Trial Evaluating  
21 Directly Observed Anti-HCV Therapy in a population receiving opioid substitute therapy from  
22 community pharmacy. *International Journal of Drug Policy* 2017 DOI:  
23 10.1016/j.drugpo.2017.05.042
- 24 23. Loudon K, Treweek S, Sullivan F, Donnan P, Thorpe KE The PRECIS-2 tool: designing  
25 trials that are fit for purpose. *BMJ* 2015; 350:h2147. DOI: 101136/bmj2147
- 26 24. Dieterich DT, Thomas DL, Messinger D, Nelson M. Development of a simple, non-  
27 invasive index to predict significant fibrosis in patients with HIV/HCV co-infection.  
28 *Hepatology* 2006; 43: 1317-1325
- 29 25 Tait JM, Stephens BP, McIntyre PG, Evans M, Dillon JF. Dry blood spot testing for  
30 hepatitis C in people who injected drugs: reaching the populations other tests cannot reach.  
31 *Frontline Gastroenterology* 2013;4:255-262.
- 32 26. Implementation Intentions and Goal Achievement: A Meta-analysis of Effects and  
33 Processes Peter M. Gollwitzer, Paschal Sheeran. *Advances in Experimental Social*  
34 *Psychology* 2006;38:69-119
- 35 27. European Monitoring Centre for Drugs and Drug Addiction 2016. Hepatitis C among drug  
36 users in Europe: epidemiology, treatment and prevention. EMCDDA Insights 23,  
37 Publications Office of the European Union, Luxembourg.
- 38 28. The Polaris HCV Collaborators. Global prevalence and genotype distribution of hepatitis  
39 C virus infection in 2015: a modelling study. *Lancet Gastroenterol Hepatol* 2017; 2: 161-76.  
40 [http://dx.doi.org/10.1016/S2468-1253\(16\)30181-9](http://dx.doi.org/10.1016/S2468-1253(16)30181-9). (Accessed December 2017)
- 41 29 He T, Lopez-Olivo MA, Hur C, Chhatwal J. Systematic review: cost-effectiveness of direct-  
42 acting antivirals for treatment of hepatitis C genotypes 2-6. *Alimentary Pharmacology and*  
43 *Therapeutics* 2017; 46; 8: 711-721
- 44  
45  
46  
47  
48  
49  
50  
51  
52  
53  
54  
55  
56  
57  
58  
59  
60

# Super.DOTc

|                              |                                                                                                       |
|------------------------------|-------------------------------------------------------------------------------------------------------|
| Intervention                 | <b>Health services delivery and reconfiguration - Phase 3 Cluster RCT</b>                             |
| Number of sites              | <b>6</b>                                                                                              |
| Countries involved           | <b>1</b>                                                                                              |
| Sample size                  | <b>300</b>                                                                                            |
| Type of statistical analyses |                                                                                                       |
| Participant characteristics  | <b>Age: 25-55</b><br><b>Condition: hep c infection</b><br><b>Baseline severity: 40% and prevalent</b> |
| Duration of trial            | <b>18 months</b>                                                                                      |
| Primary outcome              | <b>Sustained viral response rate</b>                                                                  |

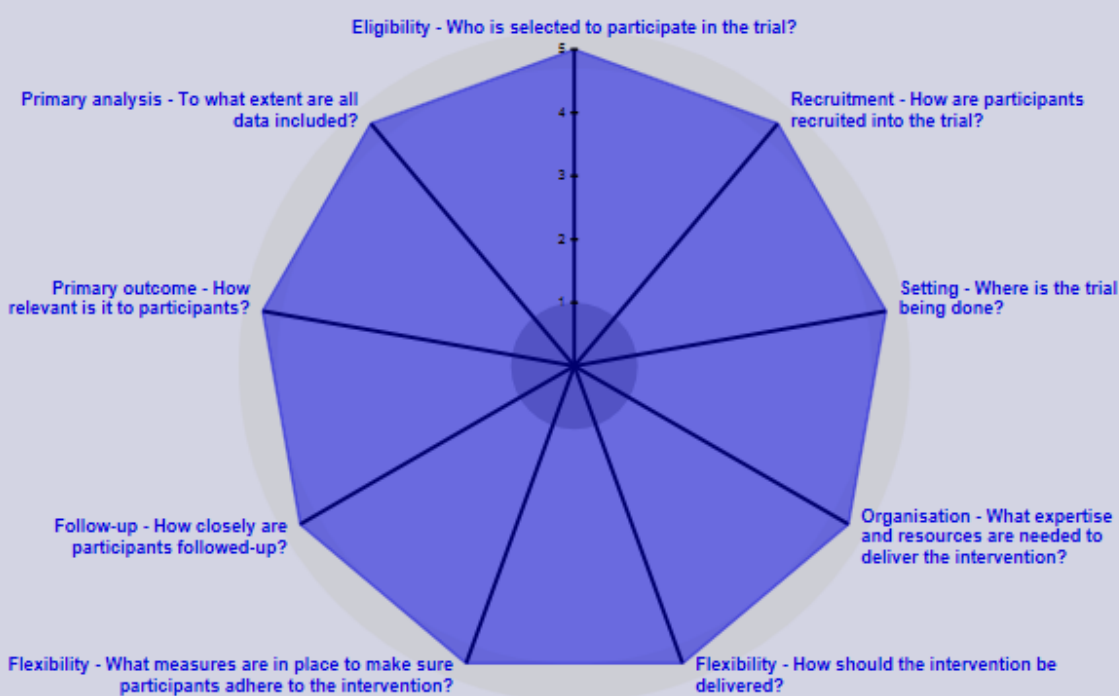

Show Score Ranges

## Scores:

(shows median if more than one score was entered)

| Elig. | Recr. | Setting | Org. Int. | Flex. Del. | Flex. Adherence | Follow-Up | Prim. Out. | Prim. An. |
|-------|-------|---------|-----------|------------|-----------------|-----------|------------|-----------|
| 5     | 5     | 5       | 5         | 5          | 5               | 5         | 5          | 5         |



## Hepatitis C Testing And Treatment Pathway

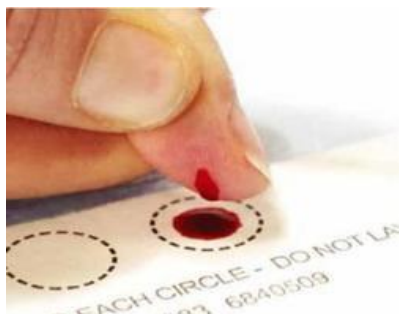

- Dry Blood Spot Testing is simple & easy to do
- DBST finds out whether you have been exposed to HCV
- Most people catch HCV by injecting
- Some people rid themselves of the virus (1 in 3)
- Most people need tablets to cure themselves

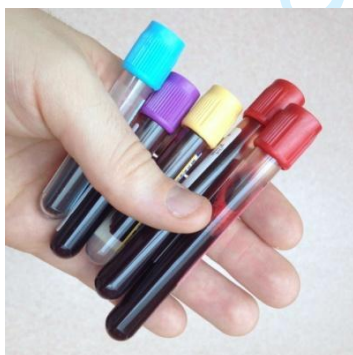

- A reactive DBST means you may still be infected
- We can tell if you are still infected and need treatment by taking a blood test. The test results arrive quickly
- The results will remain confidential
- Getting a blood test means you can get the treatment you need

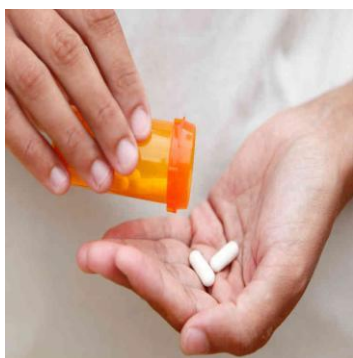

- Curing HCV means 1 or 2 tablets a day
- The treatment might last 8 or 12 weeks
- You get the tablets at the chemist each day
- Almost all people are cured by the tablets
- They have very few side effects. These are minor
- The tablets must be taken every day

**I feel so  
much  
better**

- Curing HCV is a great achievement
- It will improve the way you feel
- Getting cured is straightforward nowadays
- You can get cured just by following this pathway and attending the pharmacy each day

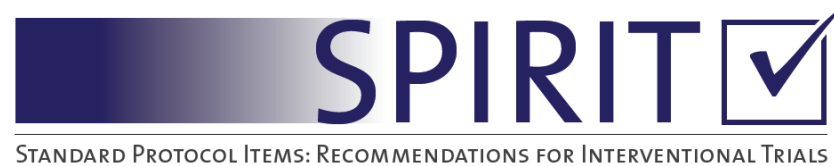

SPIRIT 2013 Checklist: Recommended items to address in a clinical trial protocol and related documents\*

| Section/item                      | Item No | Description                                                                                                                                                                                                                                                                              | Addressed on page number |
|-----------------------------------|---------|------------------------------------------------------------------------------------------------------------------------------------------------------------------------------------------------------------------------------------------------------------------------------------------|--------------------------|
| <b>Administrative information</b> |         |                                                                                                                                                                                                                                                                                          |                          |
| Title                             | 1       | Descriptive title identifying the study design, population, interventions, and, if applicable, trial acronym                                                                                                                                                                             | _____1                   |
| Trial registration                | 2a      | Trial identifier and registry name. If not yet registered, name of intended registry                                                                                                                                                                                                     | _____2                   |
|                                   | 2b      | All items from the World Health Organization Trial Registration Data Set                                                                                                                                                                                                                 | _____2                   |
| Protocol version                  | 3       | Date and version identifier                                                                                                                                                                                                                                                              | _____2                   |
| Funding                           | 4       | Sources and types of financial, material, and other support                                                                                                                                                                                                                              | _____16                  |
| Roles and responsibilities        | 5a      | Names, affiliations, and roles of protocol contributors                                                                                                                                                                                                                                  | _____17                  |
|                                   | 5b      | Name and contact information for the trial sponsor                                                                                                                                                                                                                                       | _____16                  |
|                                   | 5c      | Role of study sponsor and funders, if any, in study design; collection, management, analysis, and interpretation of data; writing of the report; and the decision to submit the report for publication, including whether they will have ultimate authority over any of these activities | _____16                  |
|                                   | 5d      | Composition, roles, and responsibilities of the coordinating centre, steering committee, endpoint adjudication committee, data management team, and other individuals or groups overseeing the trial, if applicable (see Item 21a for data monitoring committee)                         | _____17                  |



|    |                                                           |     |                                                                                                                                                                                                                                                                                                                                                                                |           |
|----|-----------------------------------------------------------|-----|--------------------------------------------------------------------------------------------------------------------------------------------------------------------------------------------------------------------------------------------------------------------------------------------------------------------------------------------------------------------------------|-----------|
| 1  | <b>Introduction</b>                                       |     |                                                                                                                                                                                                                                                                                                                                                                                |           |
| 2  |                                                           |     |                                                                                                                                                                                                                                                                                                                                                                                |           |
| 3  | Background and rationale                                  | 6a  | Description of research question and justification for undertaking the trial, including summary of relevant studies (published and unpublished) examining benefits and harms for each intervention                                                                                                                                                                             | <u>3</u>  |
| 4  |                                                           |     |                                                                                                                                                                                                                                                                                                                                                                                |           |
| 5  |                                                           |     |                                                                                                                                                                                                                                                                                                                                                                                |           |
| 6  |                                                           | 6b  | Explanation for choice of comparators                                                                                                                                                                                                                                                                                                                                          | <u>4</u>  |
| 7  |                                                           |     |                                                                                                                                                                                                                                                                                                                                                                                |           |
| 8  | Objectives                                                | 7   | Specific objectives or hypotheses                                                                                                                                                                                                                                                                                                                                              | <u>5</u>  |
| 9  |                                                           |     |                                                                                                                                                                                                                                                                                                                                                                                |           |
| 10 | Trial design                                              | 8   | Description of trial design including type of trial (eg, parallel group, crossover, factorial, single group), allocation ratio, and framework (eg, superiority, equivalence, noninferiority, exploratory)                                                                                                                                                                      | <u>6</u>  |
| 11 |                                                           |     |                                                                                                                                                                                                                                                                                                                                                                                |           |
| 12 |                                                           |     |                                                                                                                                                                                                                                                                                                                                                                                |           |
| 13 |                                                           |     |                                                                                                                                                                                                                                                                                                                                                                                |           |
| 14 | <b>Methods: Participants, interventions, and outcomes</b> |     |                                                                                                                                                                                                                                                                                                                                                                                |           |
| 15 |                                                           |     |                                                                                                                                                                                                                                                                                                                                                                                |           |
| 16 | Study setting                                             | 9   | Description of study settings (eg, community clinic, academic hospital) and list of countries where data will be collected. Reference to where list of study sites can be obtained                                                                                                                                                                                             | <u>7</u>  |
| 17 |                                                           |     |                                                                                                                                                                                                                                                                                                                                                                                |           |
| 18 |                                                           |     |                                                                                                                                                                                                                                                                                                                                                                                |           |
| 19 | Eligibility criteria                                      | 10  | Inclusion and exclusion criteria for participants. If applicable, eligibility criteria for study centres and individuals who will perform the interventions (eg, surgeons, psychotherapists)                                                                                                                                                                                   | <u>7</u>  |
| 20 |                                                           |     |                                                                                                                                                                                                                                                                                                                                                                                |           |
| 21 |                                                           |     |                                                                                                                                                                                                                                                                                                                                                                                |           |
| 22 | Interventions                                             | 11a | Interventions for each group with sufficient detail to allow replication, including how and when they will be administered                                                                                                                                                                                                                                                     | <u>8</u>  |
| 23 |                                                           |     |                                                                                                                                                                                                                                                                                                                                                                                |           |
| 24 |                                                           |     |                                                                                                                                                                                                                                                                                                                                                                                |           |
| 25 |                                                           | 11b | Criteria for discontinuing or modifying allocated interventions for a given trial participant (eg, drug dose change in response to harms, participant request, or improving/worsening disease)                                                                                                                                                                                 | <u>8</u>  |
| 26 |                                                           |     |                                                                                                                                                                                                                                                                                                                                                                                |           |
| 27 |                                                           |     |                                                                                                                                                                                                                                                                                                                                                                                |           |
| 28 |                                                           | 11c | Strategies to improve adherence to intervention protocols, and any procedures for monitoring adherence (eg, drug tablet return, laboratory tests)                                                                                                                                                                                                                              | <u>8</u>  |
| 29 |                                                           |     |                                                                                                                                                                                                                                                                                                                                                                                |           |
| 30 |                                                           |     |                                                                                                                                                                                                                                                                                                                                                                                |           |
| 31 |                                                           |     |                                                                                                                                                                                                                                                                                                                                                                                |           |
| 32 |                                                           | 11d | Relevant concomitant care and interventions that are permitted or prohibited during the trial                                                                                                                                                                                                                                                                                  | <u>8</u>  |
| 33 |                                                           |     |                                                                                                                                                                                                                                                                                                                                                                                |           |
| 34 | Outcomes                                                  | 12  | Primary, secondary, and other outcomes, including the specific measurement variable (eg, systolic blood pressure), analysis metric (eg, change from baseline, final value, time to event), method of aggregation (eg, median, proportion), and time point for each outcome. Explanation of the clinical relevance of chosen efficacy and harm outcomes is strongly recommended | <u>9</u>  |
| 35 |                                                           |     |                                                                                                                                                                                                                                                                                                                                                                                |           |
| 36 |                                                           |     |                                                                                                                                                                                                                                                                                                                                                                                |           |
| 37 |                                                           |     |                                                                                                                                                                                                                                                                                                                                                                                |           |
| 38 |                                                           |     |                                                                                                                                                                                                                                                                                                                                                                                |           |
| 39 | Participant timeline                                      | 13  | Time schedule of enrolment, interventions (including any run-ins and washouts), assessments, and visits for participants. A schematic diagram is highly recommended (see Figure)                                                                                                                                                                                               | <u>10</u> |
| 40 |                                                           |     |                                                                                                                                                                                                                                                                                                                                                                                |           |
| 41 |                                                           |     |                                                                                                                                                                                                                                                                                                                                                                                |           |
| 42 |                                                           |     |                                                                                                                                                                                                                                                                                                                                                                                |           |
| 43 |                                                           |     |                                                                                                                                                                                                                                                                                                                                                                                |           |
| 44 |                                                           |     |                                                                                                                                                                                                                                                                                                                                                                                |           |
| 45 |                                                           |     |                                                                                                                                                                                                                                                                                                                                                                                |           |
| 46 |                                                           |     |                                                                                                                                                                                                                                                                                                                                                                                |           |

1 Sample size 14 Estimated number of participants needed to achieve study objectives and how it was determined, including  
2 clinical and statistical assumptions supporting any sample size calculations

10

3  
4 Recruitment 15 Strategies for achieving adequate participant enrolment to reach target sample size

10

5  
6 **Methods: Assignment of interventions (for controlled trials)**

7  
8 Allocation:

9  
10 Sequence generation 16a Method of generating the allocation sequence (eg, computer-generated random numbers), and list of any  
11 factors for stratification. To reduce predictability of a random sequence, details of any planned restriction  
12 (eg, blocking) should be provided in a separate document that is unavailable to those who enrol participants  
13 or assign interventions

10

14  
15 Allocation concealment mechanism 16b Mechanism of implementing the allocation sequence (eg, central telephone; sequentially numbered,  
16 opaque, sealed envelopes), describing any steps to conceal the sequence until interventions are assigned

n/a

17  
18 Implementation 16c Who will generate the allocation sequence, who will enrol participants, and who will assign participants to  
19 interventions

n/a

20  
21 Blinding (masking) 17a Who will be blinded after assignment to interventions (eg, trial participants, care providers, outcome  
22 assessors, data analysts), and how

n/a

23  
24 17b If blinded, circumstances under which unblinding is permissible, and procedure for revealing a participant's  
25 allocated intervention during the trial

n/a

26  
27  
28  
29  
30 **Methods: Data collection, management, and analysis**

31  
32 Data collection methods 18a Plans for assessment and collection of outcome, baseline, and other trial data, including any related  
33 processes to promote data quality (eg, duplicate measurements, training of assessors) and a description of  
34 study instruments (eg, questionnaires, laboratory tests) along with their reliability and validity, if known.  
35 Reference to where data collection forms can be found, if not in the protocol

11

36  
37 18b Plans to promote participant retention and complete follow-up, including list of any outcome data to be  
38 collected for participants who discontinue or deviate from intervention protocols

11

|    |                                 |     |                                                                                                                                                                                                                                                                                                                                       |           |
|----|---------------------------------|-----|---------------------------------------------------------------------------------------------------------------------------------------------------------------------------------------------------------------------------------------------------------------------------------------------------------------------------------------|-----------|
| 1  | Data management                 | 19  | Plans for data entry, coding, security, and storage, including any related processes to promote data quality (eg, double data entry; range checks for data values). Reference to where details of data management procedures can be found, if not in the protocol                                                                     | <u>12</u> |
| 2  |                                 |     |                                                                                                                                                                                                                                                                                                                                       |           |
| 3  |                                 |     |                                                                                                                                                                                                                                                                                                                                       |           |
| 4  |                                 |     |                                                                                                                                                                                                                                                                                                                                       |           |
| 5  | Statistical methods             | 20a | Statistical methods for analysing primary and secondary outcomes. Reference to where other details of the statistical analysis plan can be found, if not in the protocol                                                                                                                                                              | <u>11</u> |
| 6  |                                 |     |                                                                                                                                                                                                                                                                                                                                       |           |
| 7  |                                 |     |                                                                                                                                                                                                                                                                                                                                       |           |
| 8  |                                 | 20b | Methods for any additional analyses (eg, subgroup and adjusted analyses)                                                                                                                                                                                                                                                              | <u>11</u> |
| 9  |                                 |     |                                                                                                                                                                                                                                                                                                                                       |           |
| 10 |                                 | 20c | Definition of analysis population relating to protocol non-adherence (eg, as randomised analysis), and any statistical methods to handle missing data (eg, multiple imputation)                                                                                                                                                       | <u>11</u> |
| 11 |                                 |     |                                                                                                                                                                                                                                                                                                                                       |           |
| 12 |                                 |     |                                                                                                                                                                                                                                                                                                                                       |           |
| 13 |                                 |     |                                                                                                                                                                                                                                                                                                                                       |           |
| 14 | <b>Methods: Monitoring</b>      |     |                                                                                                                                                                                                                                                                                                                                       |           |
| 15 |                                 |     |                                                                                                                                                                                                                                                                                                                                       |           |
| 16 | Data monitoring                 | 21a | Composition of data monitoring committee (DMC); summary of its role and reporting structure; statement of whether it is independent from the sponsor and competing interests; and reference to where further details about its charter can be found, if not in the protocol. Alternatively, an explanation of why a DMC is not needed | <u>13</u> |
| 17 |                                 |     |                                                                                                                                                                                                                                                                                                                                       |           |
| 18 |                                 |     |                                                                                                                                                                                                                                                                                                                                       |           |
| 19 |                                 |     |                                                                                                                                                                                                                                                                                                                                       |           |
| 20 |                                 |     |                                                                                                                                                                                                                                                                                                                                       |           |
| 21 |                                 |     |                                                                                                                                                                                                                                                                                                                                       |           |
| 22 |                                 | 21b | Description of any interim analyses and stopping guidelines, including who will have access to these interim results and make the final decision to terminate the trial                                                                                                                                                               | <u>13</u> |
| 23 |                                 |     |                                                                                                                                                                                                                                                                                                                                       |           |
| 24 |                                 |     |                                                                                                                                                                                                                                                                                                                                       |           |
| 25 | Harms                           | 22  | Plans for collecting, assessing, reporting, and managing solicited and spontaneously reported adverse events and other unintended effects of trial interventions or trial conduct                                                                                                                                                     | <u>14</u> |
| 26 |                                 |     |                                                                                                                                                                                                                                                                                                                                       |           |
| 27 |                                 |     |                                                                                                                                                                                                                                                                                                                                       |           |
| 28 | Auditing                        | 23  | Frequency and procedures for auditing trial conduct, if any, and whether the process will be independent from investigators and the sponsor                                                                                                                                                                                           | <u>13</u> |
| 29 |                                 |     |                                                                                                                                                                                                                                                                                                                                       |           |
| 30 |                                 |     |                                                                                                                                                                                                                                                                                                                                       |           |
| 31 |                                 |     |                                                                                                                                                                                                                                                                                                                                       |           |
| 32 | <b>Ethics and dissemination</b> |     |                                                                                                                                                                                                                                                                                                                                       |           |
| 33 |                                 |     |                                                                                                                                                                                                                                                                                                                                       |           |
| 34 | Research ethics approval        | 24  | Plans for seeking research ethics committee/institutional review board (REC/IRB) approval                                                                                                                                                                                                                                             | <u>14</u> |
| 35 |                                 |     |                                                                                                                                                                                                                                                                                                                                       |           |
| 36 |                                 |     |                                                                                                                                                                                                                                                                                                                                       |           |
| 37 | Protocol amendments             | 25  | Plans for communicating important protocol modifications (eg, changes to eligibility criteria, outcomes, analyses) to relevant parties (eg, investigators, REC/IRBs, trial participants, trial registries, journals, regulators)                                                                                                      | <u>14</u> |
| 38 |                                 |     |                                                                                                                                                                                                                                                                                                                                       |           |
| 39 |                                 |     |                                                                                                                                                                                                                                                                                                                                       |           |
| 40 |                                 |     |                                                                                                                                                                                                                                                                                                                                       |           |
| 41 |                                 |     |                                                                                                                                                                                                                                                                                                                                       |           |
| 42 |                                 |     |                                                                                                                                                                                                                                                                                                                                       |           |
| 43 |                                 |     |                                                                                                                                                                                                                                                                                                                                       |           |
| 44 |                                 |     |                                                                                                                                                                                                                                                                                                                                       |           |
| 45 |                                 |     |                                                                                                                                                                                                                                                                                                                                       |           |
| 46 |                                 |     |                                                                                                                                                                                                                                                                                                                                       |           |

|    |                               |     |                                                                                                                                                                                                                                                                                     |            |
|----|-------------------------------|-----|-------------------------------------------------------------------------------------------------------------------------------------------------------------------------------------------------------------------------------------------------------------------------------------|------------|
| 1  | Consent or assent             | 26a | Who will obtain informed consent or assent from potential trial participants or authorised surrogates, and how (see Item 32)                                                                                                                                                        | <u>13</u>  |
| 2  |                               |     |                                                                                                                                                                                                                                                                                     |            |
| 3  |                               |     |                                                                                                                                                                                                                                                                                     |            |
| 4  |                               | 26b | Additional consent provisions for collection and use of participant data and biological specimens in ancillary studies, if applicable                                                                                                                                               | <u>n/a</u> |
| 5  |                               |     |                                                                                                                                                                                                                                                                                     |            |
| 6  |                               |     |                                                                                                                                                                                                                                                                                     |            |
| 7  | Confidentiality               | 27  | How personal information about potential and enrolled participants will be collected, shared, and maintained in order to protect confidentiality before, during, and after the trial                                                                                                | <u>15</u>  |
| 8  |                               |     |                                                                                                                                                                                                                                                                                     |            |
| 9  |                               |     |                                                                                                                                                                                                                                                                                     |            |
| 10 | Declaration of interests      | 28  | Financial and other competing interests for principal investigators for the overall trial and each study site                                                                                                                                                                       | <u>15</u>  |
| 11 |                               |     |                                                                                                                                                                                                                                                                                     |            |
| 12 |                               |     |                                                                                                                                                                                                                                                                                     |            |
| 13 | Access to data                | 29  | Statement of who will have access to the final trial dataset, and disclosure of contractual agreements that limit such access for investigators                                                                                                                                     | <u>15</u>  |
| 14 |                               |     |                                                                                                                                                                                                                                                                                     |            |
| 15 |                               |     |                                                                                                                                                                                                                                                                                     |            |
| 16 | Ancillary and post-trial care | 30  | Provisions, if any, for ancillary and post-trial care, and for compensation to those who suffer harm from trial participation                                                                                                                                                       | <u>16</u>  |
| 17 |                               |     |                                                                                                                                                                                                                                                                                     |            |
| 18 |                               |     |                                                                                                                                                                                                                                                                                     |            |
| 19 | Dissemination policy          | 31a | Plans for investigators and sponsor to communicate trial results to participants, healthcare professionals, the public, and other relevant groups (eg, via publication, reporting in results databases, or other data sharing arrangements), including any publication restrictions | <u>16</u>  |
| 20 |                               |     |                                                                                                                                                                                                                                                                                     |            |
| 21 |                               |     |                                                                                                                                                                                                                                                                                     |            |
| 22 |                               |     |                                                                                                                                                                                                                                                                                     |            |
| 23 |                               |     |                                                                                                                                                                                                                                                                                     |            |
| 24 |                               | 31b | Authorship eligibility guidelines and any intended use of professional writers                                                                                                                                                                                                      | <u>16</u>  |
| 25 |                               |     |                                                                                                                                                                                                                                                                                     |            |
| 26 |                               | 31c | Plans, if any, for granting public access to the full protocol, participant-level dataset, and statistical code                                                                                                                                                                     | <u>n/a</u> |
| 27 |                               |     |                                                                                                                                                                                                                                                                                     |            |
| 28 |                               |     |                                                                                                                                                                                                                                                                                     |            |
| 29 | <b>Appendices</b>             |     |                                                                                                                                                                                                                                                                                     |            |
| 30 | Informed consent materials    | 32  | Model consent form and other related documentation given to participants and authorised surrogates                                                                                                                                                                                  | <u>n/a</u> |
| 31 |                               |     |                                                                                                                                                                                                                                                                                     |            |
| 32 |                               |     |                                                                                                                                                                                                                                                                                     |            |
| 33 | Biological specimens          | 33  | Plans for collection, laboratory evaluation, and storage of biological specimens for genetic or molecular analysis in the current trial and for future use in ancillary studies, if applicable                                                                                      | <u>n/a</u> |
| 34 |                               |     |                                                                                                                                                                                                                                                                                     |            |
| 35 |                               |     |                                                                                                                                                                                                                                                                                     |            |
| 36 |                               |     |                                                                                                                                                                                                                                                                                     |            |

37 \*It is strongly recommended that this checklist be read in conjunction with the SPIRIT 2013 Explanation & Elaboration for important clarification on the items.  
 38 Amendments to the protocol should be tracked and dated. The SPIRIT checklist is copyrighted by the SPIRIT Group under the Creative Commons  
 39 "[Attribution-NonCommercial-NoDerivs 3.0 Unported](#)" license.  
 40

# BMJ Open

## Clinical effectiveness of pharmacy-led versus conventionally delivered antiviral treatment for Hepatitis C in patients receiving opioid substitution therapy: A study protocol for a pragmatic cluster randomised trial

|                                 |                                                                                                                                                                                                                                                                                                                                                                                                                                                                                                  |
|---------------------------------|--------------------------------------------------------------------------------------------------------------------------------------------------------------------------------------------------------------------------------------------------------------------------------------------------------------------------------------------------------------------------------------------------------------------------------------------------------------------------------------------------|
| Journal:                        | <i>BMJ Open</i>                                                                                                                                                                                                                                                                                                                                                                                                                                                                                  |
| Manuscript ID                   | bmjopen-2017-021443.R1                                                                                                                                                                                                                                                                                                                                                                                                                                                                           |
| Article Type:                   | Protocol                                                                                                                                                                                                                                                                                                                                                                                                                                                                                         |
| Date Submitted by the Author:   | 08-May-2018                                                                                                                                                                                                                                                                                                                                                                                                                                                                                      |
| Complete List of Authors:       | Radley, Andrew; NHS Tayside, Directorate of Public Health; University of Dundee Division of Cardiovascular and Diabetes Medicine, Liver Group<br>De Bruin, M; University of Aberdeen,<br>Inglis, Sarah; University of Dundee, Division of Neuoscience; University of Dundee, Tayside Clinical Trials Unit<br>Donnan, Peter; University of Dundee, Dundee Epidemiology and Biostatistics Unit<br>Dillon, John; University of Dundee Division of Cardiovascular and Diabetes Medicine, Liver Group |
| <b>Primary Subject Heading</b>: | Gastroenterology and hepatology                                                                                                                                                                                                                                                                                                                                                                                                                                                                  |
| Secondary Subject Heading:      | Addiction, Patient-centred medicine, Public health                                                                                                                                                                                                                                                                                                                                                                                                                                               |
| Keywords:                       | Hepatitis C, Clinical Pathways, Community Pharmacy, Randomised controlled trial, Direct-Acting antivirals                                                                                                                                                                                                                                                                                                                                                                                        |
|                                 |                                                                                                                                                                                                                                                                                                                                                                                                                                                                                                  |

SCHOLARONE™  
Manuscripts

1  
2  
3  
4 **Clinical effectiveness of pharmacy-led versus conventionally delivered**  
5 **antiviral treatment for Hepatitis C in patients receiving opioid substitution**  
6 **therapy: A study protocol for a pragmatic cluster randomised trial**  
7  
8  
9

10 **Authors:** Authors: Andrew Radley <sup>1</sup>; Marijn de Bruin <sup>2</sup>; Sarah K Inglis <sup>3</sup>, Peter T Donnan <sup>3</sup>,  
11 John F Dillon <sup>4</sup>  
12

13  
14 **Affiliations:**

- 15  
16 1. NHS Tayside, Directorate of Public Health, Kings Cross Hospital, Clepington Road, Dundee DD3  
17 8EA  
18  
19 2. University of Aberdeen, 2nd Floor Health Sciences Building Room 206 Foresterhill Campus  
20 Ashgrove Road Aberdeen AB25 2ZD  
21  
22 3. Tayside Clinical Trials Unit, University of Dundee, Ninewells Hospital and Medical School, Dundee  
23 DD1 9SY  
24  
25 4. University of Dundee, Division of Molecular and Clinical Medicine , Ninewells Hospital and Medical  
26 School, Dundee DD1 9SY  
27  
28  
29  
30  
31

32  
33 **Running Head:**

34  
35  
36 Hepatitis C Testing and Treatment in Community Pharmacies  
37

38  
39 **Corresponding Author:**

40  
41 Andrew Radley

42 NHS Tayside, Directorate of Public Health, Kings Cross Hospital, Clepington Road, Dundee DD3 8EA

43  
44 Tel: 01382 425681

45  
46 e-mail: Andrew.Radley@nhs.net  
47

48  
49  
50 **Key Words:** Hepatitis C; clinical pathways; community pharmacy; Randomised controlled  
51 trial; direct-acting antivirals  
52  
53  
54  
55  
56  
57  
58  
59  
60

## Abstract

Introduction: Hepatitis C Virus (HCV) infection affects 0.7% of the general population, and up to 40% of people prescribed Opioid Substitution Therapy (OST) in Scotland. In conventional care, less than 10% of OST users are tested for HCV and less than 25% of these initiate treatment. Community pharmacists see this group frequently to provide OST supervision. This study examines whether a pharmacist-led 'test & treat' pathway increases cure rates for HCV.

Methods and Analysis: This protocol describes a cluster randomised trial where 60 community pharmacies provide either conventional or pharmacy-led care. All pharmacies offer dried blood spot testing (DBST) for HCV. Participants have attended the pharmacy for OST for 3 months; are positive for HCV genotype 1 or 3; not co-infected with HIV and/or hepatitis B; no decompensated liver disease; not pregnant. For conventional care, pharmacists refer HCV positive participants to a local centre for assessment. In the pharmacy-led arm, pharmacists assess participants themselves in the pharmacy. Drug prescribing is by nurse prescribers (conventional arm) or pharmacist prescribers (pharmacy-led arm). Treatment in both arms is delivered as daily modified directly observed therapy (DOT) in a pharmacy. Primary trial outcome is number of sustained viral responses (SVR) at 12 weeks after treatment completion. Secondary trial outcomes are number of tests taken; treatment uptake; completion; adherence; re-infection. An economic evaluation will assess potential cost-effectiveness. Qualitative research interviews with clients and health professionals assess acceptability of a pharmacist-led pathway.

Ethics and Dissemination: This protocol has been ethically approved by the East of Scotland Research Ethics Committee 2 (15/ES/0086) and complies with the Declaration of Helsinki and principles of Good Clinical Practice. Informed consent is obtained before study enrolment and only anonymised data is stored in a secured database, enabling an audit trail. Results will be submitted to international peer-reviewed journals and presented at international conferences.

ClinicalTrials.gov Identifier: NCT02706223

Protocol version 3.0

Date 27 May 2016

1  
2  
3  
4 Strengths and limitations of this study  
5

- 6 • Real world study developed using the Medical Research Council (MRC) Guideline on  
7 complex interventions  
8
- 9 • Potential to provide answers to an extremely topical question around approaches to  
10 eliminate a disease, in line with a World Health Organisation (WHO) target.  
11
- 12 • Utilises a community pharmacy-based pathway in NHS Scotland, but not wider  
13 primary care systems  
14
- 15 • Relies on close and integrated working between a specialist hepatitis service and  
16 community pharmacy services  
17

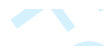

18  
19  
20  
21  
22  
23  
24  
25  
26  
27  
28  
29  
30  
31  
32  
33  
34  
35  
36  
37  
38  
39  
40  
41  
42  
43  
44  
45  
46  
47  
48  
49  
50  
51  
52  
53  
54  
55  
56  
57  
58  
59  
60  
peer review only



## Background

Hepatitis C (HCV) is a blood-borne viral infection causing liver disease. Around 0.7% of the Scottish population are chronically infected with HCV [1]. Patient outcomes from HCV infection vary, with 25% clearing the infection spontaneously and the remainder becoming chronically infected, risking development of cirrhosis and hepatocellular carcinoma [2]. A recent Public Health England report highlighted that less than half of those infected with HCV have been identified, and of those identified less than 3% of those known to be infected with HCV are being treated [3]. The greatest risk of acquiring the virus in the UK is through injecting drug use [4] and evidence suggests around 40% of people in Scotland receiving Opioid Substitution Therapy (OST) have HCV infection [5]. Only a small proportion of this high-risk and vulnerable population are receiving adequate treatment, despite having daily healthcare interaction with a pharmacist and the availability of a curative intervention with widely available Direct Acting Antiviral (DAA) medication [6].

The conventional care pathway in the United Kingdom recommends that patients with a history of intravenous drug use, or those currently prescribed OST, should be offered HCV testing annually [3]. Testing may be available from their GPs, drug workers, drug agencies, social workers, community pharmacies and needle exchanges [7]. Once diagnosed, patients can be referred to established treatment pathways, usually based around hepatology teams in secondary care. In these established treatment pathways, less than 10% of the OST population are tested for HCV annually. Of those tested, at most 25% start treatment in one of the dedicated centres and 70-80% successfully complete treatment, with treatment failure primarily caused by non-adherence and non-persistence to treatment [8]. Similar patterns are observed in other countries [9]. The inefficiency of established treatment pathways leads to increased preventable deaths from HCV and viral transmission within the injecting population [10].

A variety of reasons may explain the low rates of HCV testing, treatment uptake, and treatment completion. People who inject drugs (PWID) may encounter a number of barriers that prevent them from accessing care, including perceptions and experience of stigma and discrimination, issues with the organisation of care and the treatment policies of providers or payers [11]. There are identified deficiencies in the extent of screening and diagnosis of at-risk populations, as well as the need to simplify pathways to enable treatment initiation and clinical monitoring [12]. People who inject drugs may find it difficult to consistently attend medical clinics [13].

The WHO has set an ambitious goal to eliminate HCV as a public health threat by 2030 [14].

1  
2  
3 Creating the complex interventions necessary to eradicate HCV requires that well-designed  
4 cross-disciplinary programmes are put in place using different strategies to increase  
5 screening, testing and diagnosis [15]. Strategies that demonstrate increase testing and  
6 treatment uptake include the provision of integrated HCV care pathways; with drug use and  
7 psychiatric services delivered by a multidisciplinary team, and with case management  
8 services [16]. The delivery of HCV testing and treatment through community-based care  
9 pathways has also been shown to be feasible and DBST has been demonstrated to increase  
10 the uptake of testing from high-risk populations [17]. Hence, a more central role in the  
11 treatment of HCV for community-based pharmacists who are seeing these clients on a daily  
12 basis, could – in theory – lead to increased HCV treatment success rates through higher  
13 HCV testing, treatment uptake, adherence, and treatment completion rates.

14  
15  
16 In preparation for the current trial investigating the clinical benefits of pharmacy-delivered  
17 HCV treatment, pilot work was undertaken guided by the MRC theoretical framework for  
18 developing and evaluating complex interventions [18]. Initial work involved using a co-  
19 production approach in partnership with OST patients. This work identified the current  
20 experiences of patients in accessing HCV testing and treatment and in accessing OST in  
21 pharmacies [19]. The attributes of an ideal service were identified and an estimate of  
22 potential uptake made [20]. The implementation of DBST in pharmacies was undertaken and  
23 the experiences of patients and providers recorded [21]. A pilot trial has been undertaken to  
24 test each stage of the pharmacy-led care pathway and to look for confirmation that an  
25 appropriately powered definitive multicenter randomised controlled trial would be feasible  
26 [22]. The PRECIS-2 tool was used to assess that the design decisions were concordant with  
27 the purpose of the trial (Supplementary file 1) [23].

28  
29  
30 The aim of this research is to examine the impact of pharmacy-delivered HCV treatment on  
31 HCV treatment success rates amongst OST users. Our research questions are:

### 32 *Trial*

33  
34 (1) Does a community pharmacist-led HCV treatment pathway increase treatment success  
35 rates (sustained virological response, or SVR) compared to the conventional pathway?

36  
37 (2) Does a community pharmacist-led HCV treatment pathway lead to a higher uptake of  
38 HCV testing?

39  
40 (3) Does a community pharmacist-led HCV treatment pathway lead to a higher uptake and  
41 completion of HCV treatment?

1  
2  
3 (4) Is adherence and persistence to HCV therapy in the pharmacy setting similar to that in  
4 the Conventional pathway?  
5

6  
7 (5) What is the re-infection rate at 12 months after end of treatment in all patients with SVR,  
8 and for the pharmacist-led pathway compared to the conventional pathway?  
9

#### 10 *Health Economics Study*

11  
12  
13 (6) Is the pharmacist-led pathway potentially a cost-effective method of testing and treating  
14 HCV in people prescribed OST?  
15

#### 16 *Qualitative Study*

17  
18 (7) Is the pharmacist-led pathway an acceptable way to offer testing and treatment for  
19 people prescribed OST infected with HCV and are there any unexpected consequences?  
20  
21  
22

### 23 **Methods:**

#### 24 *Design*

25  
26 Super DOT-C is a cluster randomised trial of pharmacy-led anti HCV therapy versus  
27 conventional care in HCV infected patients attending community pharmacies (Table 1). Sixty  
28 pharmacies will be enrolled to this study across 5 hubs in Health Boards in NHS Scotland.  
29 Pharmacies (and thus their patients) participating in the trial will be randomly allocated to  
30 conventional care pathway or the pharmacy-led pathway.  
31

32 Pharmacies at each site are randomised into two groups: conventional care and pharmacist-  
33 led care. Randomisation will be carried out using <http://www.randomization.com>. The  
34 subjects are randomized into one block along with the number of subjects per block/number  
35 of blocks and (case-sensitive) treatment labels. The pharmacies in each hub provide the  
36 level of randomisation, so patient allocation is dependent on the pharmacy attended.  
37  
38

#### 39 *Eligibility Criteria*

40 Eligible pharmacies are community-based, offer DBST for HCV by trained pharmacy staff in  
41 line with approved practice in their particular NHS board and have at least 30 patients on  
42 OST to ensure adequate recruitment. Patient inclusion criteria are having HCV Polymerase  
43 Chain Reaction (PCR) positive to genotype 1 or 3, are OST users and willing to have their  
44 pharmacists supervise their antiviral drug use. Patient exclusion criteria are having another  
45 genotype than 1 or 3, evidence of current or previous decompensated liver disease, Human  
46 Immunodeficiency Virus (HIV) infection, surface antigen of Hepatitis B Virus (HBV) HBsAg  
47 positive with detectable HBV DNA, aggressive or violent behaviour towards the pharmacist,  
48 being pregnant, and not being able to provide informed consent.  
49  
50  
51  
52  
53  
54  
55  
56  
57  
58  
59  
60

## Interventions

### Medication provided

The anti HCV treatment provided in both pathways is identical, i.e:

- For HCV genotype 1 sofosbuvir/ledipasvir for 8 weeks
- For HCV genotype 3 sofosbuvir/daclatasvir for 12 weeks

### Study Site Staff Training

Staff from each study site will receive training on Good Clinical Practice, quality control, use of study documentation, ensuring common practice, and consenting participants. In addition training to establish testing for blood borne viruses is provided and information on hepatitis C and its treatment is provided. Staff in the pharmacy-led arm are trained on how to interpret laboratory bloods and to perform a Fib4 calculation [24].

**Table 1: Treatment pathways: similarities and differences**

|                              | <b>Conventional care</b>                                                                                            | <b>Pharmacy pathway</b>                                                                                                  | <b>Contrast</b>                                                                                                                                      |
|------------------------------|---------------------------------------------------------------------------------------------------------------------|--------------------------------------------------------------------------------------------------------------------------|------------------------------------------------------------------------------------------------------------------------------------------------------|
| <b>HCV testing</b>           | Opportunistic HCV testing on presentation for OST therapy                                                           | Opportunistic HCV testing on presentation for OST therapy                                                                | The same procedure is provided in each of the study arms                                                                                             |
| <b>HCV test confirmation</b> | Test result is communicated and - if positive – referred for assessment in local treatment centre                   | Test result is communicated and – if positive - assessment directly undertaken in the pharmacy                           | Assessment for treatment is carried out at the pharmacy when the participant visits to obtain OST, not at a different site with a different provider |
| <b>Treatment initiation</b>  | Suitable patients are prescribed treatment by a nurse prescriber at the local treatment centre and access treatment | Suitable patients are prescribed treatment by a pharmacist prescriber and access treatment through DOT at their pharmacy | Treatment initiation is carried out at the pharmacy and not at a different site with a different provider                                            |

|                             |                                                                            |                                                     |                                                                                                                                                       |
|-----------------------------|----------------------------------------------------------------------------|-----------------------------------------------------|-------------------------------------------------------------------------------------------------------------------------------------------------------|
|                             | through DOT at their pharmacy                                              |                                                     |                                                                                                                                                       |
| <b>Treatment monitoring</b> | Treatment monitoring is carried out by the specialist team in their clinic | Treatment monitoring is carried out at the pharmacy | Treatment monitoring is carried out at the pharmacy not at a different site. Monitoring in the conventional pathway requires additional clinic visits |
| <b>Treatment completion</b> | SVR testing is carried out by DBST at the pharmacy                         | SVR testing is carried out by DBST at the pharmacy  | The same procedure is provided in each of the study arms                                                                                              |

### *Conventional Care Pathway*

At the start of the pathway pharmacists will opportunistically discuss HCV infection with their OST patients. The pharmacist will record on a screening log which of the OST patients attending the pharmacy they have approached. Those with unknown HCV status will be offered testing using a DBST in the pharmacy [25]. Patients identified as having HCV antibodies will have a post-test discussion with the pharmacist. During this discussion the pharmacists will obtain informed consent and explain about HCV treatment using a standard infographic (supplementary file 2). Next, the pharmacist will offer them referral to the conventional care pathway for assessment and treatment at a local treatment centre. Information will be provided verbally and by offering standard leaflets about HCV. If the patient attends an appointment at one of the local treatment centres, a member of the specialist hepatitis team will invite the patient to undertake assessment for treatment for HCV. Assessment comprises of a pre-treatment checklist of medical co-morbidities, medical history, and concomitant medication to look for drug-drug interactions. The patient will undergo phlebotomy in the local treatment centre to check full blood count, urea and electrolytes, liver function testing, including markers of liver fibrosis [24] (Fib4, APRI, AST:ALT ratio) and viral parameters (genotype and load), as assessment for treatment. Patients who are referred for assessment and treatment will be managed according to the standard local treatment pathway. Daily supervised OST treatment is delivered by the pharmacy, in which the doses of methadone or buprenorphine are provided by the pharmacy staff, who observe consumption. In both arms of the study DAA treatment is delivered jointly

1  
2  
3 with OST in their normal pharmacy; which would qualify as DOT during weekdays, although  
4 at weekends patients usually self-administer. Prescriptions will be provided by a nurse  
5 prescriber and dispensed at the participant's normal pharmacy. For doses that patients have  
6 to self-administer and the weekend doses when there is no OST distribution, the pharmacist  
7 and patient will make a brief if-then action plan (an implementation intention) and coping  
8 plan (to overcome anticipated barriers) [26]. The study related data collection will be  
9 undertaken by the specialist hepatitis team.  
10  
11  
12  
13

### 14 15 *Pharmacist-Led Pathway*

16  
17 Potential participants are offered testing, recruited and consented as in the conventional  
18 pathway. In the pharmacy-led pathway however, the pharmacist will offer them anti-HCV  
19 therapy delivered solely within the pharmacy. The patients who decline study participation  
20 will be entered in the screening log. For the patients who do consent, the pharmacist will  
21 complete a pre-treatment checklist of medical co-morbidities, medical history, and  
22 concomitant medication to look for drug-drug interactions. The patient will undergo  
23 phlebotomy in the pharmacy for safety blood tests, as in the conventional pathway and the  
24 pharmacist will assess this information to determine suitability for treatment.  
25  
26  
27  
28  
29

30 If there are no contra-indications to therapy, the patient will commence the treatment. In  
31 patients where there are contraindications or queries about suitability, the pharmacist will  
32 contact the central clinical co-ordinator for advice. The pharmacist-led pathway requires an  
33 assessment which includes identification of concurrent specific medical conditions,  
34 screening of safety bloods, calculation of a Fib-4 score, assessment of interacting concurrent  
35 medication and assessment of factors likely to impinge on treatment compliance. Potential  
36 participants with a FIB-4 score of > 3.25 are referred on to the Conventional Care Pathway  
37 for review. The Pharmacist-led Pathway therefore excludes this group from being entered  
38 into the trial. Instead, they are assessed for treatment through the Conventional Care  
39 Pathway where they are reviewed in hospital by a medical consultant who decides if it is  
40 safe to proceed with treatment and if yes, may select different drugs'. Unsuitable patients are  
41 therefore referred to the conventional pathway for assessment outside the study and  
42 provided with standard clinical care. Prescriptions for treatment will be provided by  
43 pharmacist prescriber.  
44  
45  
46  
47  
48  
49  
50  
51

52 Each time that patients pick up their medication from the pharmacy, a daily log is completed,  
53 recording any occurrence of side-effects or adverse events.  
54  
55

56 Participants who do not attend the pharmacy for seven consecutive days will be  
57 discontinued from the study since they will be deemed to have discontinued their course of  
58 DAA treatment and will have had their OST prescription suspended.  
59  
60



1  
2  
3 Participants are likely to be retained within the study through the mechanism of daily  
4 attendance for receipt of supervised OST; this is a powerful mechanism making people  
5 return to the pharmacy. It is intended that data will still be collected on participants who may  
6 not complete their course of treatment, since partial completion may produce an SVR also.  
7  
8  
9

10 The primary study outcome (SVR 12 weeks after treatment completion) is assessed by  
11 DBST in the pharmacies for both study arms.  
12  
13

### 14 **Outcomes and measures**

15  
16 The denominator for the outcomes on treatment uptake is the number of people using OST at  
17 the pharmacies participating in the respective arms. For the primary outcome, the numerator  
18 will be the number of patients with Sustained Viral Response at 12 weeks post treatment  
19 completion (SVR12) after allocation to treatment arm, measured through a test for the  
20 presence of HCV RNA (polymerase chain reaction).  
21  
22  
23

24  
25 For the secondary outcomes on treatment uptake, the numerators are the number of patients  
26 who (a) undergo HCV testing, (b) initiate HCV treatment, (c) complete the 12-week HCV  
27 course, (d) number of patients with SVR at 12 months (to assess the impact of potential  
28 reinfection).  
29  
30

### 31 **Study schedule**

32  
33 For both arms, screening for HCV by DBST is undertaken prior to recruitment ( $t_0$ ); participant  
34 consent ( $t_1$ ) is followed by 8 or 12 weeks of treatment according to HCV genotype ( $t_{12}$ ), 12  
35 weeks post-treatment a final SVR test is taken to determine the study outcome ( $t_{\text{endpoint}}$ )  
36  
37  
38

### 39 **Sample Size:**

40  
41 Approximately 22,000 patients are prescribed OST across Scotland [26]. Around 85% of  
42 these patients receive daily or regular supervision of their OST consumption through one of  
43 the 1200 community pharmacies. It is expected that at least 40% of these patients will be  
44 infected with HCV, and that around 46% and 48% of infections will be with Genotype 1 and  
45 Genotype 3 respectively [9]. The pharmacies acting as cluster sites for this trial have around  
46 1,800 patients attending for supervised OST administration. Sixty community pharmacies  
47 based around 5 study sites within Scottish NHS Boards, will be coordinated through the  
48 Tayside Clinical Trials Unit (TCTU) of the Tayside Medical Science Centre, University of  
49 Dundee.  
50  
51  
52  
53  
54

55  
56 As the pharmacy-led pathway is a specific population-based intervention, the number of  
57 patients on OST treatment at each pharmacy will be the denominator for calculating DBST  
58 uptake. The HCV infection status of all the OST patients in the denominator population is not  
59  
60

1  
2  
3 known. National data repeatedly shows approximately 40% of Patients on OST are HCV  
4 positive, as this is a randomised trial it can be assumed that the rate of HCV positivity in the  
5 OST patients/pharmacies randomised to the pathways should be the same. The study will be  
6 powered through rates of HCV therapy offered. Approximately 3% of HCV positive OST  
7 patients enter HCV therapy per year via conventional pathways, with 2.5% of the total eligible  
8 population achieving SVR per annum. If it is estimated that the new pathway increased this to  
9 15%, a sample in each arm of 141 ( $2N = 282$ ) will give 90% power at the significance level.  
10  
11 The clustered design requires inflation to account for intracluster correlation, so if the average  
12 infected subjects per pharmacy is 12, the Inflation Factor for sizes of cluster assuming an intra-  
13 cluster correlation of 0.05, is 1.55. This leads to a need for  $2N = 437$ .

14  
15  
16 The sample of 60 pharmacies with an average of 30 OST patients per pharmacy gives 1800  
17 OST patients, assuming 40% HCV positive, gives 700 to 800 potential patients for study. This  
18 gives significant protection against any changes in baseline SVR success rates, but also  
19 against pharmacy drop-outs or local issues that prevent an enrolled pharmacy from  
20 participation. This is trial of a pathway so all eligible patients are the denominator for the power  
21 calculation, not the patients who actually enter the pathway and are treated.

22  
23  
24 The randomisation of the pharmacies will be stratified by associated hub centre. The endpoint  
25 of the study is the effectiveness of the pathway so any drop-outs are part of the study  
26 outcomes, so there is no need to increase the sample size to allow for a dropout rate.

### 27 28 29 Data collection, management and analysis

30  
31  
32 Analysis of the trial will follow the principles outlined in the ICH E9 'Statistical Principles for  
33 Clinical Trials' and carried out by the UKCRC registered Tayside Clinical Trials Unit (TCTU).  
34 Prior to data lock an agreed Statistical Analysis Plan (SAP) will be finalised covering the pre-  
35 specified statistical analysis.

36  
37  
38 The primary outcome of SVR will be assessed as a binary outcome for subjects and so will  
39 utilise logistic regression modelling. The numerator will be the number of subjects achieving  
40 SVR at 12 weeks and the denominator will be total number of patients using OST and having  
41 an HCV infection diagnosed at the participating pharmacies. Additionally results will be  
42 expressed as a proportion of the estimated HCV infected subjects on OST. The estimated  
43 number of infected patients will be based on national survey data and the empirical rate  
44 discovered in the trial (allowing for patients who refuse testing). In order to account for the  
45 clustered nature of the trial, a mixed-effects logistic regression model will be performed with  
46 the parameter indicator of trial arm in the model and a random parameter to account for within  
47 cluster correlation as well as stratified by hub. As all patients will have either achieved SVR or



1  
2  
3 not and we will assume that drop-outs / lost to follow-up are failures, there will be no missing  
4 data in the primary outcome. Extra- binomial variability or over-dispersion will be examined in  
5 the logistic model and if present alternative modelling such as negative binomial models will  
6 be considered. This will also be adjusted by therapy and genotype; the two factors are  
7 interdependent determining length of therapy.  
8  
9  
10

11 Secondary binary outcomes - will be analysed in the same procedure, initially as intention to  
12 treat with all eligible patients as the denominator and then to explore the steps in the pathway  
13 by per protocol analysis in particular to analyse on treatment success:  
14  
15  
16

- 17 • Proportion of HCV tested: within the duration of the study of those attending pharmacy  
18 sites for OST, for the conventional and for the pharmacist-led arm
- 19 • Proportion that initiate HCV treatment within the duration of the study of those identified  
20 with HCV, for the conventional and for the pharmacist-led arm.  
21  
22  
23  
24

25 Proportion that complete the course of those initiating treatment: Multiple logistic regression  
26 modelling will explore the patient and pharmacy characteristics that are associated with the  
27 secondary outcomes and primary outcome. Patient outcomes considered will be:  
28  
29

- 30 • age
- 31 • gender
- 32 • deprivation,
- 33 • employment,
- 34 • co-morbidity,
- 35 • psycho-social variables assessed.  
36  
37  
38

39 Pharmacy characteristics considered will be:

- 40 • geographic location
- 41 • type of pharmacy service
- 42 • size of OST population.  
43  
44  
45  
46

47 Determination of re-infection: As the determination of possible re-infection is an important and  
48 stated secondary outcome in this study, all patients will be invited to consent for a further DBS  
49 HCV PCR one year after end of therapy or at end of the study, whichever is first. Those  
50 patients who achieve SVR will be invited to participate at their pharmacy. People prescribed  
51 Opioid Substitution Therapy (OST) are retained in the service for many years, since their  
52 progress of recovery and becoming drug-free is slow. In addition, movement out of Dundee,  
53 which is relatively geographically isolated, is minimal. We are therefore confident that we can  
54 identify all patients still in receipt of a prescription for OST and invite them to be re-tested for  
55  
56  
57  
58  
59  
60

1  
2  
3 Hepatitis C. Since the network of pharmacies providing OST, are also trained to provide  
4 testing, we believe this is feasible  
5

#### 6 7 Data management 8

9  
10 An EXCEL database will be used to hold the study related data. This will be managed and  
11 controlled by the coordinating pharmacist in NHS Tayside with site specific data being  
12 transcribed from a paper Case Report Form (CRF) formulated in line with the EXCEL  
13 database, with the study protocol and in line with the requirements of the investigators.  
14  
15 Development and validation of the study database, quality control and extraction of data will  
16 be done according to study sponsor procedures. Extracts for analysis will be based on the  
17 data tables provided by the study team.  
18  
19

#### 20 21 Health Economic Assessment 22

23  
24 Economic analysis will be undertaken alongside the trial, utilizing the costs, resource use  
25 and effectiveness data generated within the trial. The number of SVRs achieved at the end  
26 of the trial will be combined with the cost data to calculate the incremental cost per cure. A  
27 longer term analysis incorporating the cost and benefits of potential lifetime gains through  
28 citizenship will be undertaken.  
29  
30  
31

#### 32 33 Qualitative Assessment 34

35  
36 The qualitative research will take the form of a process evaluation building on previous  
37 exploratory and preparatory work (22). It will contribute to the assessment of the feasibility  
38 and acceptability to service users and providers of a pharmacy-led testing and treatment  
39 pathway (including identification of barriers and facilitators and unintended consequences of  
40 participation).  
41  
42  
43

44  
45 Interviews will be conducted with small samples of (i) consenting study participants and (ii)  
46 professionals providing the pharmacist led pathway by researchers at University of Dundee.  
47  
48

49  
50 Qualitative interviews will be conducted with consenting participants and professionals using  
51 semi-structured topic guides developed in line with the research aims. Topics will not be  
52 explored in a prescriptive manner but as part of an open discussion. This flexible format will  
53 enable additional salient topics and insights to emerge. In broad terms, the focus for the  
54 different respondent groups will be as follows:  
55  
56  
57  
58  
59  
60

1  
2  
3 One-to-one interviews with consenting participants (all of whom have engaged with the  
4 service) will explore views on issues around the delivery and promotion of the pharmacist-  
5 led pathway, their response to the offer and delivery of treatment, and any unintended  
6 consequences.  
7  
8  
9

10  
11 Interviews with professionals will explore issues around implementation of the intervention  
12 and the trial elements, identify challenges and ways they have been overcome, and  
13 perceived response among participants.  
14  
15  
16

17 With the interviewee's consent, all interviews and focus group discussions will be recorded  
18 as digital audio files, which will then be transcribed in full for thematic analysis. Transcripts  
19 will be organized using a thematic framework based on topics specified in the topic guide  
20 and emerging themes identified through a process of familiarization with transcript texts.  
21  
22  
23

## 24 25 Patient and Public Involvement

26  
27  
28 In developing the research question and outcome measures for study, pilot work was  
29 undertaken using focus groups of people prescribed OST and their carers', to explore their  
30 experiences of using community pharmacies [19]. The priorities and experiences of people  
31 prescribed OST were further evaluated through a discrete choice experiment, which was  
32 used to aid the design of the pharmacy-led pathway [20]. A process evaluation was  
33 employed as part of the development of the DBST intervention in pharmacies, where  
34 recipients were asked about their experiences and preferences for testing for hepatitis C  
35 [21]. The process evaluation approach was also repeated as part of a feasibility study in  
36 which the assessment and treatment of hepatitis C in this group was piloted, to further  
37 understand how the intervention would be accommodated by participants [22]. The  
38 information gained from this exercise has been fed back to groups of service users attending  
39 the local community support and harm reduction centre. Patients have not been involved in  
40 the recruitment to this study  
41  
42  
43  
44  
45  
46  
47  
48  
49  
50

## 51 52 Discussion

53  
54 Liver disease has become a major cause of premature death in the developed world and HCV  
55 is a major contributor to this burden [27]. The care of people infected with HCV therapy has  
56 undergone a paradigm shift due to the efficacy of direct acting antiviral drugs and the  
57 consequent simplification of therapy, with highly effective treatment choices marketed across  
58  
59  
60

1  
2  
3 the world [28]. However, new and more effective pathways of care are urgently required in  
4 order to enhance testing and linkage to care and treatment [16]. These novel pathways of care  
5 need to be carefully evaluated both for efficacy and cost-effectiveness compared to traditional  
6 pathways, as well as for unintended consequences. This pragmatic, cluster-randomised trial  
7 can provide strong evidence of the effectiveness of a pharmacist delivered care pathway for  
8 HCV eradication therapy in patients receiving OST. A comparison will be undertaken with the  
9 current clinical care pathway where patients are referred to a conventional clinic to receive  
10 their HCV treatment. Trial design has aimed for high applicability in design decisions [24] and  
11 this trial is expected to directly inform the future organisation of care.  
12  
13  
14  
15  
16  
17

## 18 **Ethics and Dissemination**

19  
20  
21 The study will be conducted in accordance with the principles of good clinical practice (GCP).  
22

23 In addition to Sponsorship approval, approval was received for this study (15/ES/0086) from  
24 East of Scotland Research Ethics Committee 2 on 27 May 2016. Caldicott guardian approval  
25 was given on 16 December 2016 to allow NHS Tayside to pass information to the cluster  
26 community pharmacies about the HCV test status of patients that they are seeing to provide  
27 OST supervision. NHS R&D approvals have been obtained from each health board taking  
28 part in the study.  
29  
30  
31  
32

### 33 *Harms*

34  
35 Regular follow up of the participants will occur daily in the DOT arm during the study treatment  
36 period by a pharmacist familiar in the trial methodology. For those participants allocated to the  
37 conventional therapy, regular clinical follow up will occur in line with prevailing conventional  
38 NHS standard of care. At each visit participants will be monitored for expected Adverse Events  
39 (AEs) as per the Summary of Product (SmPC) characteristics for the drug treatments used in  
40 this study. This is in line with the current standard of care for the NHS and only AEs outside  
41 these criteria will formally be recorded as Adverse Events  
42  
43  
44  
45  
46

47 Bloods for viral load would be performed as outlined in the Study Schedule, at the pre  
48 treatment visit and at 12 weeks post completion of therapy, as per the attached study  
49 schedule. Data on testing, referral, initiation of (and adherence to), therapy are routinely  
50 collected for the HCV clinical data base and these data will also be utilised.  
51  
52  
53

54 In addition baseline and end of treatment checking of prescribed and non-prescribed  
55 medications and drug use, as documented in the study concomitant medications log, will be  
56 carried out to investigate the relationship between any adverse events and drug interactions.  
57  
58  
59

### 60 *Consenting Participants*

Potential participants will be approached by pharmacy staff familiar with the trial methodology and trained in Good Clinical Practice. They will be provided with information on the study verbally and via the Patient Information Sheet (PIS) and be given at least 24 hours to consider participation.

At their return visit for screening they will be interviewed by the study pharmacist and asked to sign an informed consent form, once they are satisfied that they have had adequate explanation from the pharmacist explaining the trial to them.

### *Confidentiality*

The data will be collected by the researcher (treatment delivering pharmacist or nurse) on a paper CRF with subsequent transcription to electronic CRF. Electronic storage will be in an encrypted form on a password protected device. The medical notes will act as source data for past medical history & blood results

All laboratory specimens, evaluation forms, reports, and other records will be identified in a manner designed to maintain participant confidentiality. All records will be kept in a secure storage area with limited access to study staff only. Clinical information will not be released without the written permission of the participant, except as necessary for monitoring and auditing by the Sponsor or its designee. The CI and study staff involved with this study will not disclose or use for any purpose other than performance of the study, any data, record, or other unpublished, confidential information disclosed to those individuals for the purpose of the study. Prior written agreement from the Sponsor or its designee will be obtained for the disclosure of any said confidential information to other parties.

### *Data Protection*

The CI and study staff involved with this study will comply with the requirements of the Data Protection Act 1998 with regard to the collection, storage, processing and disclosure of personal information and will uphold the Act's core principles. The CI and study staff will also adhere, if appropriate, to the current version of the NHS Scotland Code of Practice on Protecting Patient Confidentiality. Access to collated participant data will be restricted to the CI and appropriate study staff. Computers used to collate the data will have limited access measures via user names and passwords. Published results will not contain any personal data that could allow identification of individual participants.

## **Trial Organisation**

### *Trial management*

Overall management of the trial is being provided by the Tayside Clinical Trials Unit (TCTU), a UK Clinical Research Collaboration (UKCRC)-registered clinical trials unit. A study Clinical Trial Manager supported by a Study Coordinator will oversee the study and will be accountable to the Chief Investigator (CI). They will be responsible for checking the Case Report Forms for completeness, plausibility and consistency. However, this remains the overall responsibility of the CI. Any queries will be resolved by the CI or delegated member of the study team.

A study-specific Delegation Log will be prepared for the study at each site, detailing the responsibilities of each member of staff working on the study.

A Trial Steering Committee will be established to oversee the conduct and progress of the study. The Steering Committee will include the investigators above, as well as the NHS Tayside Director of Pharmacy and a representative from the Chief Pharmaceutical Officers Team at the Scottish Government. The Steering Committee will take all executive decisions. The responsibility of the Steering Committee is to ensure the scientific integrity and quality of the project. To achieve this, the specific responsibilities of the Steering Committee include: maintaining adherence to the study protocol; approving changes to study protocol if required; reviewing quality assurance indicators; monitoring study recruitment and the overall study timetable; advising, as required, on specific scientific items that may arise; compliance with legislation; adherence to research governance; reporting to funders; approving publication and dissemination strategies. The Steering Committee will meet every 6 months.

### **Trial Status**

Recruitments commenced in December 2016. On 9 October 2017, 234 were consented to the trial.

### **Declarations**

#### Trial Funding

This study was funded in partnership by the Scottish Government, Gilead Inc and Bristol-Myers Squib. Funders have no responsibilities for or authority over study design; collection, management, analysis or interpretation of data; writing of the report; and the decision to submit the report for publication

1  
2  
3  
4 Reporting guideline: SPIRIT 2013 statement: defining standard protocol items for clinical trials

5  
6 [http://annals.org/aim/article/1556168/spirit-2013-statement-defining-standard-protocol-items-](http://annals.org/aim/article/1556168/spirit-2013-statement-defining-standard-protocol-items-clinical-trials)  
7  
8 [clinical-trials](http://annals.org/aim/article/1556168/spirit-2013-statement-defining-standard-protocol-items-clinical-trials)

9  
10 Contributorship Statement:

11  
12 AR: study conception, planning and design, protocol preparation, manuscript preparation.

13  
14 MdB: study conception, planning and design, protocol preparation manuscript preparation

15  
16 JFD: study conception and design, protocol preparation, manuscript preparation

17  
18 SI: protocol preparation, randomisation, study management, manuscript preparation

19  
20 Competing Interests:

21  
22 Mr Radley: Honorariums from Gilead and Abbvie; Research Grants from Gilead and Roche

23  
24 Professor Dillon: Research Grants, and Honorariums from Abbvie, Bristol Myers Squibb,

25  
26 Gilead, Janssen, Merck Roche Sharp & Dohme and Roche.

27  
28 Dr Inglis: None

29  
30 Prof Donnan: Research grants from Novo Nordisk, GSK, Shire pharmaceuticals, Gilead and

31  
32 Bristol Myers Squibb. Member of the New Drugs Committee of the Scottish Medicines Consortium.

33  
34 Prof de Bruin: None



## References

1. Scottish Intercollegiate Guidelines Network (SIGN). Management of hepatitis C. Edinburgh: SIGN; 2013. (SIGN publication no. 133). [July 2013]. Available from URL: <http://www.sign.ac.uk> (Accessed September 2018)
2. Arain A, Robaeys G. Eligibility of persons who inject drugs for treatment of hepatitis C virus infection. *World J Gastroenterol* 2014; 20(36): 12722-12733 <http://www.wjnet.com/1007-9327/full/v20/i36/12722.htm> (Accessed September 2018)
3. Hepatitis C annual report: progress made, but much more to do. *Public Health England*. July 2014. <https://www.gov.uk/government/news/hepatitis-c-annual-report-progress-made-but-much-more-to-do> (Accessed September 2018)
4. Martin N, Foster GR; Vilar J; Ryder S; Cramp M; Gordon F; Dillon JF; Craine N; Busse H; Clements A; Hutchinson SJ; Ustianowski A; Ramsay M; Goldberg DJ Irving W; Hope V; DeAngelis D; Lyons M; Vickerman P, Hickman M. HCV treatment rates and sustained viral response among people who inject drugs in seven UK sites: real world results and modelling of treatment impact *Journal of Viral Hepatitis* 2014 doi:10.1111/jvh.12338.
5. Aspinall EJ, Doyle JS, Corson S, Hellard ME, Hunt D, Goldberg D, Nguyen T, Falck-Ytter Y, Morgan RL, Smith B, Stooze M, Wiktor SZ, Hutchinson S. Targeted hepatitis C antibody testing interventions: a systematic review and meta-analysis. *Eur J Epidemiol* 2015. DOI 10.1007/s10654-014-9958-4
6. Grebely J, Bruneau J, Bruggman P, Harris M, Hickman M, Rhodes T. Elimination of hepatitis C virus infection among PWID: The beginning of a new era of interferon-free DAA therapy. *IJDP* 2017; 47:26-33
7. Tait JM, Wang H, Stephens BP, Miller M, Mclntyre PG, Cleary S, Dillon JF. Multidisciplinary managed care networks—Life-saving interventions for hepatitis C patients. *Journal of Viral Hepatitis* 2016. DOI: 10.1111/jvh.12633
8. McAllister, G., Innes, H., Mcleod, A., Dillon, J. F., Hayes, P. C., Fox, R., Barclay, S. T., Templeton, K., Aitken, C., Gunson, R., Goldberg, D. & Hutchinson, S. J. Uptake of hepatitis C specialist services and treatment following diagnosis by dried blood spot in Scotland. *Journal of Clinical Virology* 2014;61(3):359-64. doi: 10.1016/j.jcv.2014.09.004.
9. European Monitoring Centre for Drugs and Drug Addiction (2016), Hepatitis C among drug users in Europe: epidemiology, treatment and prevention, EMCDDA Insights 23, Publications Office of the European Union, Luxembourg
10. Treloar C, Newland J, Rance J, Hopwood M. Uptake and delivery of hepatitis C treatment in opiate substitution treatment: perceptions of clients and health professionals. *Journal of Viral Hepatitis*. 2010;17:839–844,
11. Lavanchy D. The global burden of hepatitis C. *Liver International* 2009; 29(s1): 74-81
12. Konerman M, Lok, ASF. Hepatitis C treatment and barriers to eradication. *Clinical and Translational Gastroenterology* 2016; 7,e193: doi: 10.1038/ctg.2016.50
13. Papatheodoridis GV, Tsochatzis E, Hardtke S, Wedeyer H. Barriers to care and treatment for patients with chronic viral hepatitis in Europe: a systematic review. *Liver International* 2014; 34: 1452-1463
14. WHO 2016. Combating Hepatitis B and C to reach elimination by 2030 – Advocacy Brief. World Health Organisation, Geneva May 2016. <http://www.who.int/hiv/topics/hepatitis/en/>
15. Wade AJ, Veronese V, Hellard ME, Doyle JS. A systematic review of community based hepatitis C treatment. *BMC Infectious Diseases* 2016; 202: DOI 10.1186/s12879-016-548-5
16. Leask JD, Dillon JF. Targeting people who inject drugs as a pathway towards hepatitis C eradication. *Alimentary Pharmacology and Therapeutics* 2016; 44: 145-156.



- 1  
2  
3 17 Bajis S, Dore GJ, Hajarizadeh B, Cunningham EB, Maher L, Grebely J. Interventions to  
4 enhance testing, linkage to care and treatment uptake for hepatitis C virus infection among  
5 people who inject drugs: A systematic review. *International Journal of Drug Policy* 2017; 47:  
6 34-46.  
7  
8 18. Craig P, Dieppe P, Macintyre S, Michie S, Nazareth I, Petticrew M. Developing and  
9 evaluating complex interventions: new guidance 2006. Medical Research Council.  
10 <https://www.mrc.ac.uk/documents/pdf/complex-interventions-guidance/> (Accessed  
11 September 2018)  
12  
13 19. Radley A, Melville K, Easton P, Williams B, Dillon J. "Standing Outside the Junkie Door"  
14 Service Users' Experiences of Using Community Pharmacies to Access Treatment for  
15 Opioid Dependency. *Journal of Public Health* 2016 DOI: 10.1093/pubmed/fdw138.  
16  
17 20. Radley A, van der Pol M, Dillon JF. Designing a hepatitis C testing service in primary  
18 care: a discrete choice experiment. *Gut* 2016; 64 (S1).  
19 [http://gut.bmj.com/content/64/Suppl\\_1/A103.2](http://gut.bmj.com/content/64/Suppl_1/A103.2) (accessed September 2018)  
20  
21 21 Radley A, Melville K, Tait J, Stephens B, Evans JMM, Dillon JF. A Quasi-Experimental  
22 Evaluation of Dried Blood Spot Testing through Community Pharmacies in the Tayside  
23 Region of Scotland. *Frontline Gastroenterology* 2017. doi:10.1136/flgastro-2016-100776  
24  
25 22. Radley A, Tait J, Dillon JF. DOT-C: A Cluster Randomised Feasibility Trial Evaluating  
26 Directly Observed Anti-HCV Therapy in a population receiving opioid substitute therapy from  
27 community pharmacy. *International Journal of Drug Policy* 2017 DOI:  
28 10.1016/j.drugpo.2017.05.042  
29  
30 23. Loudon K, Treweek S, Sullivan F, Donnan P, Thorpe KE The PRECIS-2 tool: designing  
31 trials that are fit for purpose. *BMJ* 2015; 350:h2147. DOI: 101136/bmjh2147  
32  
33 24. Dieterich DT, Thomas DL, Messinger D, Nelson M. Development of a simple, non-invasive  
34 index to predict significant fibrosis in patients with HIV/HCV co-infection. *Hepatology* 2006;  
35 43: 1317-1325  
36  
37 25 Tait JM, Stephens BP, McIntyre PG, Evans M, Dillon JF. Dry blood spot testing for  
38 hepatitis C in people who injected drugs: reaching the populations other tests cannot reach.  
39 *Frontline Gastroenterology* 2013;4:255–262.  
40  
41 26. Gollwitzer PM, Sheeran P Implementation Intentions and Goal Achievement: A  
42 Meta-analysis of Effects and Processes. *Advances in Experimental Social Psychology*  
43 2006;38:69–119  
44  
45 27. The Polaris HCV Collaborators. Global prevalence and genotype distribution of hepatitis  
46 C virus infection in 2015: a modelling study. *Lancet Gastroenterol Hepatol* 2017; 2: 161–76.  
47 [http://dx.doi.org/10.1016/S2468-1253\(16\)30181-9](http://dx.doi.org/10.1016/S2468-1253(16)30181-9). (Accessed September 2018)  
48  
49 28 He T, Lopez-Olivo MA, Hur C, Chhatwal J. Systematic review: cost-effectiveness of direct-  
50 acting antivirals for treatment of hepatitis C genotypes 2-6. *Alimentary Pharmacology and*  
51 *Therapeutics* 2017; 46; 8: 711–721  
52  
53  
54  
55  
56  
57  
58  
59  
60

## Super.DOTc

|                              |                                                                                                       |
|------------------------------|-------------------------------------------------------------------------------------------------------|
| Intervention                 | <b>Health services delivery and reconfiguration - Phase 3 Cluster RCT</b>                             |
| Number of sites              | <b>6</b>                                                                                              |
| Countries involved           | <b>1</b>                                                                                              |
| Sample size                  | <b>300</b>                                                                                            |
| Type of statistical analyses |                                                                                                       |
| Participant characteristics  | <b>Age: 25-55</b><br><b>Condition: hep c infection</b><br><b>Baseline severity: 40% and prevalent</b> |
| Duration of trial            | <b>18 months</b>                                                                                      |
| Primary outcome              | <b>Sustained viral response rate</b>                                                                  |



Show Score Ranges

### Scores:

(shows median if more than one score was entered)

| Elig. | Recr. | Setting | Org. Int. | Flex. Del. | Flex. Adherence | Follow-Up | Prim. Out. | Prim. An. |
|-------|-------|---------|-----------|------------|-----------------|-----------|------------|-----------|
| 5     | 5     | 5       | 5         | 5          | 5               | 5         | 5          | 5         |

## Hepatitis C Testing And Treatment Pathway

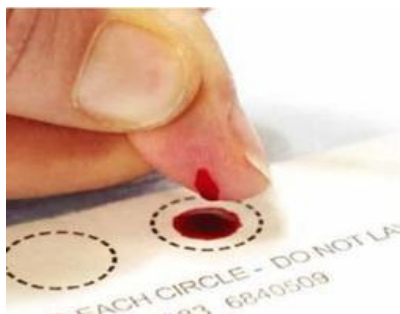

- Dry Blood Spot Testing is simple & easy to do
- DBST finds out whether you have been exposed to HCV
- Most people catch HCV by injecting
- Some people rid themselves of the virus (1 in 3)
- Most people need tablets to cure themselves



- A reactive DBST means you may still be infected
- We can tell if you are still infected and need treatment by taking a blood test. The test results arrive quickly
- The results will remain confidential
- Getting a blood test means you can get the treatment you need



- Curing HCV means 1 or 2 tablets a day
- The treatment might last 8 or 12 weeks
- You get the tablets at the chemist each day
- Almost all people are cured by the tablets
- They have very few side effects. These are minor
- The tablets must be taken every day

**I feel so  
much  
better**

- Curing HCV is a great achievement
- It will improve the way you feel
- Getting cured is straightforward nowadays
- You can get cured just by following this pathway and attending the pharmacy each day

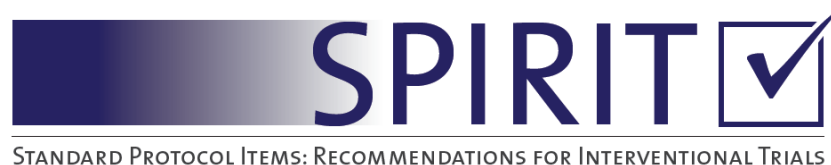

STANDARD PROTOCOL ITEMS: RECOMMENDATIONS FOR INTERVENTIONAL TRIALS

SPIRIT 2013 Checklist: Recommended items to address in a clinical trial protocol and related documents\*

| Section/item                      | Item No | Description                                                                                                                                                                                                                                                                              | Addressed on page number |
|-----------------------------------|---------|------------------------------------------------------------------------------------------------------------------------------------------------------------------------------------------------------------------------------------------------------------------------------------------|--------------------------|
| <b>Administrative information</b> |         |                                                                                                                                                                                                                                                                                          |                          |
| Title                             | 1       | Descriptive title identifying the study design, population, interventions, and, if applicable, trial acronym                                                                                                                                                                             | _____1                   |
| Trial registration                | 2a      | Trial identifier and registry name. If not yet registered, name of intended registry                                                                                                                                                                                                     | _____2                   |
|                                   | 2b      | All items from the World Health Organization Trial Registration Data Set                                                                                                                                                                                                                 | _____2                   |
| Protocol version                  | 3       | Date and version identifier                                                                                                                                                                                                                                                              | _____2                   |
| Funding                           | 4       | Sources and types of financial, material, and other support                                                                                                                                                                                                                              | _____16                  |
| Roles and responsibilities        | 5a      | Names, affiliations, and roles of protocol contributors                                                                                                                                                                                                                                  | _____17                  |
|                                   | 5b      | Name and contact information for the trial sponsor                                                                                                                                                                                                                                       | _____16                  |
|                                   | 5c      | Role of study sponsor and funders, if any, in study design; collection, management, analysis, and interpretation of data; writing of the report; and the decision to submit the report for publication, including whether they will have ultimate authority over any of these activities | _____16                  |
|                                   | 5d      | Composition, roles, and responsibilities of the coordinating centre, steering committee, endpoint adjudication committee, data management team, and other individuals or groups overseeing the trial, if applicable (see Item 21a for data monitoring committee)                         | _____17                  |

1 **Introduction**

2

3 Background and rationale 6a Description of research question and justification for undertaking the trial, including summary of relevant studies (published and unpublished) examining benefits and harms for each intervention

3

4

5

6 6b Explanation for choice of comparators

4

7

8 Objectives 7 Specific objectives or hypotheses

5

9

10 Trial design 8 Description of trial design including type of trial (eg, parallel group, crossover, factorial, single group), allocation ratio, and framework (eg, superiority, equivalence, noninferiority, exploratory)

6

11

12

13

14 **Methods: Participants, interventions, and outcomes**

15

16 Study setting 9 Description of study settings (eg, community clinic, academic hospital) and list of countries where data will be collected. Reference to where list of study sites can be obtained

7

17

18

19 Eligibility criteria 10 Inclusion and exclusion criteria for participants. If applicable, eligibility criteria for study centres and individuals who will perform the interventions (eg, surgeons, psychotherapists)

7

20

21

22 Interventions 11a Interventions for each group with sufficient detail to allow replication, including how and when they will be administered

8

23

24

25 11b Criteria for discontinuing or modifying allocated interventions for a given trial participant (eg, drug dose change in response to harms, participant request, or improving/worsening disease)

8

26

27

28 11c Strategies to improve adherence to intervention protocols, and any procedures for monitoring adherence (eg, drug tablet return, laboratory tests)

8

29

30

31 11d Relevant concomitant care and interventions that are permitted or prohibited during the trial

8

32

33

34 Outcomes 12 Primary, secondary, and other outcomes, including the specific measurement variable (eg, systolic blood pressure), analysis metric (eg, change from baseline, final value, time to event), method of aggregation (eg, median, proportion), and time point for each outcome. Explanation of the clinical relevance of chosen efficacy and harm outcomes is strongly recommended

9

35

36

37

38

39 Participant timeline 13 Time schedule of enrolment, interventions (including any run-ins and washouts), assessments, and visits for participants. A schematic diagram is highly recommended (see Figure)

10

|    |                                                                     |     |                                                                                                                                                                                                                                                                                                                                                                                                              |            |
|----|---------------------------------------------------------------------|-----|--------------------------------------------------------------------------------------------------------------------------------------------------------------------------------------------------------------------------------------------------------------------------------------------------------------------------------------------------------------------------------------------------------------|------------|
| 1  | Sample size                                                         | 14  | Estimated number of participants needed to achieve study objectives and how it was determined, including clinical and statistical assumptions supporting any sample size calculations                                                                                                                                                                                                                        | <u>10</u>  |
| 2  |                                                                     |     |                                                                                                                                                                                                                                                                                                                                                                                                              |            |
| 3  |                                                                     |     |                                                                                                                                                                                                                                                                                                                                                                                                              |            |
| 4  | Recruitment                                                         | 15  | Strategies for achieving adequate participant enrolment to reach target sample size                                                                                                                                                                                                                                                                                                                          | <u>10</u>  |
| 5  |                                                                     |     |                                                                                                                                                                                                                                                                                                                                                                                                              |            |
| 6  | <b>Methods: Assignment of interventions (for controlled trials)</b> |     |                                                                                                                                                                                                                                                                                                                                                                                                              |            |
| 7  |                                                                     |     |                                                                                                                                                                                                                                                                                                                                                                                                              |            |
| 8  | Allocation:                                                         |     |                                                                                                                                                                                                                                                                                                                                                                                                              |            |
| 9  |                                                                     |     |                                                                                                                                                                                                                                                                                                                                                                                                              |            |
| 10 | Sequence generation                                                 | 16a | Method of generating the allocation sequence (eg, computer-generated random numbers), and list of any factors for stratification. To reduce predictability of a random sequence, details of any planned restriction (eg, blocking) should be provided in a separate document that is unavailable to those who enrol participants or assign interventions                                                     | <u>10</u>  |
| 11 |                                                                     |     |                                                                                                                                                                                                                                                                                                                                                                                                              |            |
| 12 |                                                                     |     |                                                                                                                                                                                                                                                                                                                                                                                                              |            |
| 13 |                                                                     |     |                                                                                                                                                                                                                                                                                                                                                                                                              |            |
| 14 |                                                                     |     |                                                                                                                                                                                                                                                                                                                                                                                                              |            |
| 15 |                                                                     |     |                                                                                                                                                                                                                                                                                                                                                                                                              |            |
| 16 | Allocation concealment mechanism                                    | 16b | Mechanism of implementing the allocation sequence (eg, central telephone; sequentially numbered, opaque, sealed envelopes), describing any steps to conceal the sequence until interventions are assigned                                                                                                                                                                                                    | <u>n/a</u> |
| 17 |                                                                     |     |                                                                                                                                                                                                                                                                                                                                                                                                              |            |
| 18 |                                                                     |     |                                                                                                                                                                                                                                                                                                                                                                                                              |            |
| 19 |                                                                     |     |                                                                                                                                                                                                                                                                                                                                                                                                              |            |
| 20 | Implementation                                                      | 16c | Who will generate the allocation sequence, who will enrol participants, and who will assign participants to interventions                                                                                                                                                                                                                                                                                    | <u>n/a</u> |
| 21 |                                                                     |     |                                                                                                                                                                                                                                                                                                                                                                                                              |            |
| 22 |                                                                     |     |                                                                                                                                                                                                                                                                                                                                                                                                              |            |
| 23 | Blinding (masking)                                                  | 17a | Who will be blinded after assignment to interventions (eg, trial participants, care providers, outcome assessors, data analysts), and how                                                                                                                                                                                                                                                                    | <u>n/a</u> |
| 24 |                                                                     |     |                                                                                                                                                                                                                                                                                                                                                                                                              |            |
| 25 |                                                                     |     |                                                                                                                                                                                                                                                                                                                                                                                                              |            |
| 26 |                                                                     |     |                                                                                                                                                                                                                                                                                                                                                                                                              |            |
| 27 |                                                                     | 17b | If blinded, circumstances under which unblinding is permissible, and procedure for revealing a participant's allocated intervention during the trial                                                                                                                                                                                                                                                         | <u>n/a</u> |
| 28 |                                                                     |     |                                                                                                                                                                                                                                                                                                                                                                                                              |            |
| 29 |                                                                     |     |                                                                                                                                                                                                                                                                                                                                                                                                              |            |
| 30 | <b>Methods: Data collection, management, and analysis</b>           |     |                                                                                                                                                                                                                                                                                                                                                                                                              |            |
| 31 |                                                                     |     |                                                                                                                                                                                                                                                                                                                                                                                                              |            |
| 32 | Data collection methods                                             | 18a | Plans for assessment and collection of outcome, baseline, and other trial data, including any related processes to promote data quality (eg, duplicate measurements, training of assessors) and a description of study instruments (eg, questionnaires, laboratory tests) along with their reliability and validity, if known. Reference to where data collection forms can be found, if not in the protocol | <u>11</u>  |
| 33 |                                                                     |     |                                                                                                                                                                                                                                                                                                                                                                                                              |            |
| 34 |                                                                     |     |                                                                                                                                                                                                                                                                                                                                                                                                              |            |
| 35 |                                                                     |     |                                                                                                                                                                                                                                                                                                                                                                                                              |            |
| 36 |                                                                     |     |                                                                                                                                                                                                                                                                                                                                                                                                              |            |
| 37 |                                                                     |     |                                                                                                                                                                                                                                                                                                                                                                                                              |            |
| 38 |                                                                     | 18b | Plans to promote participant retention and complete follow-up, including list of any outcome data to be collected for participants who discontinue or deviate from intervention protocols                                                                                                                                                                                                                    | <u>11</u>  |
| 39 |                                                                     |     |                                                                                                                                                                                                                                                                                                                                                                                                              |            |
| 40 |                                                                     |     |                                                                                                                                                                                                                                                                                                                                                                                                              |            |
| 41 |                                                                     |     |                                                                                                                                                                                                                                                                                                                                                                                                              |            |
| 42 |                                                                     |     |                                                                                                                                                                                                                                                                                                                                                                                                              |            |

|    |                                 |     |                                                                                                                                                                                                                                                                                                                                       |           |
|----|---------------------------------|-----|---------------------------------------------------------------------------------------------------------------------------------------------------------------------------------------------------------------------------------------------------------------------------------------------------------------------------------------|-----------|
| 1  | Data management                 | 19  | Plans for data entry, coding, security, and storage, including any related processes to promote data quality (eg, double data entry; range checks for data values). Reference to where details of data management procedures can be found, if not in the protocol                                                                     | <u>12</u> |
| 2  |                                 |     |                                                                                                                                                                                                                                                                                                                                       |           |
| 3  |                                 |     |                                                                                                                                                                                                                                                                                                                                       |           |
| 4  |                                 |     |                                                                                                                                                                                                                                                                                                                                       |           |
| 5  | Statistical methods             | 20a | Statistical methods for analysing primary and secondary outcomes. Reference to where other details of the statistical analysis plan can be found, if not in the protocol                                                                                                                                                              | <u>11</u> |
| 6  |                                 |     |                                                                                                                                                                                                                                                                                                                                       |           |
| 7  |                                 |     |                                                                                                                                                                                                                                                                                                                                       |           |
| 8  |                                 | 20b | Methods for any additional analyses (eg, subgroup and adjusted analyses)                                                                                                                                                                                                                                                              | <u>11</u> |
| 9  |                                 |     |                                                                                                                                                                                                                                                                                                                                       |           |
| 10 |                                 | 20c | Definition of analysis population relating to protocol non-adherence (eg, as randomised analysis), and any statistical methods to handle missing data (eg, multiple imputation)                                                                                                                                                       | <u>11</u> |
| 11 |                                 |     |                                                                                                                                                                                                                                                                                                                                       |           |
| 12 |                                 |     |                                                                                                                                                                                                                                                                                                                                       |           |
| 13 |                                 |     |                                                                                                                                                                                                                                                                                                                                       |           |
| 14 | <b>Methods: Monitoring</b>      |     |                                                                                                                                                                                                                                                                                                                                       |           |
| 15 |                                 |     |                                                                                                                                                                                                                                                                                                                                       |           |
| 16 | Data monitoring                 | 21a | Composition of data monitoring committee (DMC); summary of its role and reporting structure; statement of whether it is independent from the sponsor and competing interests; and reference to where further details about its charter can be found, if not in the protocol. Alternatively, an explanation of why a DMC is not needed | <u>13</u> |
| 17 |                                 |     |                                                                                                                                                                                                                                                                                                                                       |           |
| 18 |                                 |     |                                                                                                                                                                                                                                                                                                                                       |           |
| 19 |                                 |     |                                                                                                                                                                                                                                                                                                                                       |           |
| 20 |                                 |     |                                                                                                                                                                                                                                                                                                                                       |           |
| 21 |                                 |     |                                                                                                                                                                                                                                                                                                                                       |           |
| 22 |                                 | 21b | Description of any interim analyses and stopping guidelines, including who will have access to these interim results and make the final decision to terminate the trial                                                                                                                                                               | <u>13</u> |
| 23 |                                 |     |                                                                                                                                                                                                                                                                                                                                       |           |
| 24 |                                 |     |                                                                                                                                                                                                                                                                                                                                       |           |
| 25 | Harms                           | 22  | Plans for collecting, assessing, reporting, and managing solicited and spontaneously reported adverse events and other unintended effects of trial interventions or trial conduct                                                                                                                                                     | <u>14</u> |
| 26 |                                 |     |                                                                                                                                                                                                                                                                                                                                       |           |
| 27 |                                 |     |                                                                                                                                                                                                                                                                                                                                       |           |
| 28 | Auditing                        | 23  | Frequency and procedures for auditing trial conduct, if any, and whether the process will be independent from investigators and the sponsor                                                                                                                                                                                           | <u>13</u> |
| 29 |                                 |     |                                                                                                                                                                                                                                                                                                                                       |           |
| 30 |                                 |     |                                                                                                                                                                                                                                                                                                                                       |           |
| 31 |                                 |     |                                                                                                                                                                                                                                                                                                                                       |           |
| 32 | <b>Ethics and dissemination</b> |     |                                                                                                                                                                                                                                                                                                                                       |           |
| 33 |                                 |     |                                                                                                                                                                                                                                                                                                                                       |           |
| 34 | Research ethics approval        | 24  | Plans for seeking research ethics committee/institutional review board (REC/IRB) approval                                                                                                                                                                                                                                             | <u>14</u> |
| 35 |                                 |     |                                                                                                                                                                                                                                                                                                                                       |           |
| 36 |                                 |     |                                                                                                                                                                                                                                                                                                                                       |           |
| 37 | Protocol amendments             | 25  | Plans for communicating important protocol modifications (eg, changes to eligibility criteria, outcomes, analyses) to relevant parties (eg, investigators, REC/IRBs, trial participants, trial registries, journals, regulators)                                                                                                      | <u>14</u> |
| 38 |                                 |     |                                                                                                                                                                                                                                                                                                                                       |           |
| 39 |                                 |     |                                                                                                                                                                                                                                                                                                                                       |           |
| 40 |                                 |     |                                                                                                                                                                                                                                                                                                                                       |           |
| 41 |                                 |     |                                                                                                                                                                                                                                                                                                                                       |           |
| 42 |                                 |     |                                                                                                                                                                                                                                                                                                                                       |           |
| 43 |                                 |     |                                                                                                                                                                                                                                                                                                                                       |           |
| 44 |                                 |     |                                                                                                                                                                                                                                                                                                                                       |           |
| 45 |                                 |     |                                                                                                                                                                                                                                                                                                                                       |           |
| 46 |                                 |     |                                                                                                                                                                                                                                                                                                                                       |           |



|    |                               |     |                                                                                                                                                                                                                                                                                     |            |
|----|-------------------------------|-----|-------------------------------------------------------------------------------------------------------------------------------------------------------------------------------------------------------------------------------------------------------------------------------------|------------|
| 1  | Consent or assent             | 26a | Who will obtain informed consent or assent from potential trial participants or authorised surrogates, and how (see Item 32)                                                                                                                                                        | <u>13</u>  |
| 2  |                               |     |                                                                                                                                                                                                                                                                                     |            |
| 3  |                               |     |                                                                                                                                                                                                                                                                                     |            |
| 4  |                               | 26b | Additional consent provisions for collection and use of participant data and biological specimens in ancillary studies, if applicable                                                                                                                                               | <u>n/a</u> |
| 5  |                               |     |                                                                                                                                                                                                                                                                                     |            |
| 6  |                               |     |                                                                                                                                                                                                                                                                                     |            |
| 7  | Confidentiality               | 27  | How personal information about potential and enrolled participants will be collected, shared, and maintained in order to protect confidentiality before, during, and after the trial                                                                                                | <u>15</u>  |
| 8  |                               |     |                                                                                                                                                                                                                                                                                     |            |
| 9  |                               |     |                                                                                                                                                                                                                                                                                     |            |
| 10 | Declaration of interests      | 28  | Financial and other competing interests for principal investigators for the overall trial and each study site                                                                                                                                                                       | <u>15</u>  |
| 11 |                               |     |                                                                                                                                                                                                                                                                                     |            |
| 12 |                               |     |                                                                                                                                                                                                                                                                                     |            |
| 13 | Access to data                | 29  | Statement of who will have access to the final trial dataset, and disclosure of contractual agreements that limit such access for investigators                                                                                                                                     | <u>15</u>  |
| 14 |                               |     |                                                                                                                                                                                                                                                                                     |            |
| 15 |                               |     |                                                                                                                                                                                                                                                                                     |            |
| 16 | Ancillary and post-trial care | 30  | Provisions, if any, for ancillary and post-trial care, and for compensation to those who suffer harm from trial participation                                                                                                                                                       | <u>16</u>  |
| 17 |                               |     |                                                                                                                                                                                                                                                                                     |            |
| 18 |                               |     |                                                                                                                                                                                                                                                                                     |            |
| 19 | Dissemination policy          | 31a | Plans for investigators and sponsor to communicate trial results to participants, healthcare professionals, the public, and other relevant groups (eg, via publication, reporting in results databases, or other data sharing arrangements), including any publication restrictions | <u>16</u>  |
| 20 |                               |     |                                                                                                                                                                                                                                                                                     |            |
| 21 |                               |     |                                                                                                                                                                                                                                                                                     |            |
| 22 |                               |     |                                                                                                                                                                                                                                                                                     |            |
| 23 |                               |     |                                                                                                                                                                                                                                                                                     |            |
| 24 |                               | 31b | Authorship eligibility guidelines and any intended use of professional writers                                                                                                                                                                                                      | <u>16</u>  |
| 25 |                               |     |                                                                                                                                                                                                                                                                                     |            |
| 26 |                               | 31c | Plans, if any, for granting public access to the full protocol, participant-level dataset, and statistical code                                                                                                                                                                     | <u>n/a</u> |
| 27 |                               |     |                                                                                                                                                                                                                                                                                     |            |
| 28 | <b>Appendices</b>             |     |                                                                                                                                                                                                                                                                                     |            |
| 29 |                               |     |                                                                                                                                                                                                                                                                                     |            |
| 30 | Informed consent materials    | 32  | Model consent form and other related documentation given to participants and authorised surrogates                                                                                                                                                                                  | <u>n/a</u> |
| 31 |                               |     |                                                                                                                                                                                                                                                                                     |            |
| 32 |                               |     |                                                                                                                                                                                                                                                                                     |            |
| 33 | Biological specimens          | 33  | Plans for collection, laboratory evaluation, and storage of biological specimens for genetic or molecular analysis in the current trial and for future use in ancillary studies, if applicable                                                                                      | <u>n/a</u> |
| 34 |                               |     |                                                                                                                                                                                                                                                                                     |            |
| 35 |                               |     |                                                                                                                                                                                                                                                                                     |            |
| 36 |                               |     |                                                                                                                                                                                                                                                                                     |            |

37 \*It is strongly recommended that this checklist be read in conjunction with the SPIRIT 2013 Explanation & Elaboration for important clarification on the items.  
 38 Amendments to the protocol should be tracked and dated. The SPIRIT checklist is copyrighted by the SPIRIT Group under the Creative Commons  
 39 "[Attribution-NonCommercial-NoDerivs 3.0 Unported](https://creativecommons.org/licenses/by-nc-nd/3.0/)" license.  
 40
