# Supplementary material for: Clinical effectiveness of pharmacy-led versus conventionally delivered antiviral treatment for hepatitis C in patients receiving opioid substitution therapy: a study protocol for a pragmatic cluster randomised trial
Source: PubMed Central journal article supplement — BMJ Open. 2018 Dec 14;8(12):e021443. doi: 10.1136/bmjopen-2017-021443 (PMC6303565; doi:10.1136/bmjopen-2017-021443), 2018-12-14
Supplement: bmjopen-2017-021443supp002.pdf [file bmjopen-2017-021443supp002.pdf]

## Hepatitis C Testing And Treatment Pathway

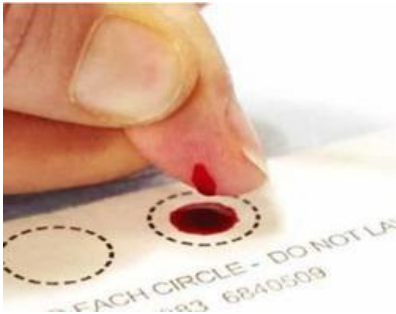

- Dry Blood Spot Testing is simple & easy to do
- DBST finds out whether you have been exposed to HCV
- Most people catch HCV by injecting
- Some people rid themselves of the virus (1 in 3)
- Most people need tablets to cure themselves

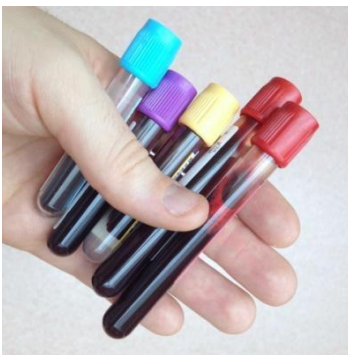

- A reactive DBST means you may still be infected
- We can tell if you are still infected and need treatment by taking a blood test. The test results arrive quickly
- The results will remain confidential
- Getting a blood test means you can get the treatment you need

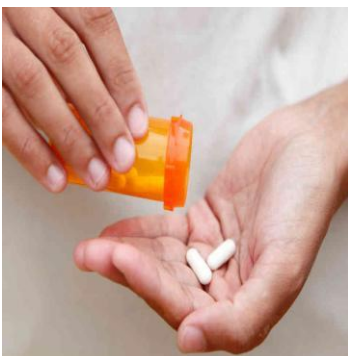

- Curing HCV means 1 or 2 tablets a day
- The treatment might last 8 or 12 weeks
- You get the tablets at the chemist each day
- Almost all people are cured by the tablets
- They have very few side effects. These are minor
- The tablets must be taken every day

**I feel so  
much  
better**

- Curing HCV is a great achievement
- It will improve the way you feel
- Getting cured is straightforward nowadays
- You can get cured just by following this pathway and attending the pharmacy each day
